# Supplementary material
Source: PubMed Central journal article supplement (PMC8672237)
Supplement: jama-e2120939-s001.pdf [file jama-e2120939-s001.pdf]

## Supplemental Online Content

Wan ES, Balte P, Schwartz JE, et al. Association between preserved ratio impaired spirometry and clinical outcomes in US adults. *JAMA*. doi:10.1001/jama.2021.20939

**eTable 1.** Characteristics of the Cohorts Included in the NHLBI Pooled Cohorts Study

**eTable 2.** Classification of Coronary Heart Disease (CHD) and Respiratory Mortality and Events

**eTable 3.** Comparison Between Nonimputed and Imputed Datasets for All-Cause Mortality Analyses

**eTable 4.** Age and Smoking-Adjusted Absolute Incidence Rates for Respiratory Mortality, Stratified by Cohort

**eTable 5.** Age and Smoking-Adjusted Absolute Incidence Rates for Respiratory Mortality, Stratified by Cohort

**eTable 6.** Age and Smoking-Adjusted Absolute Incidence Rates for Coronary Heart Disease (CHD) Mortality, Stratified by Cohort

**eTable 7.** Age and Smoking-Adjusted Absolute Incidence Rates for Respiratory-Related Events, Stratified by Cohort

**eTable 8.** Age and Smoking-Adjusted Absolute Incidence Rates for Coronary Heart Disease (CHD)-Related Events, Stratified by Cohort

**eTable 9.** Baseline Characteristics of Subjects by Lower Limit of Normal (LLN)-Defined Lung Function Categories

**eTable 10.** Associations Between Lung Function Category Defined Using GLI Equations for Lower Limit of Normal (LLN), All-Cause, Respiratory, and Coronary Heart Disease (CHD) Mortality, as Well as Respiratory-Related and CHD-Related Hospitalizations and Mortality

**eTable 11.** Associations Between Lung Function Category, All-Cause, Respiratory, and Coronary Heart Disease (CHD) Mortality, as Well as Respiratory-Related and CHD-Related Hospitalizations and Mortality, Additionally Adjusting for Baseline FEV<sub>1</sub>:FVC

**eTable 12.** Associations Between Lung Function Category, Mortality, CHD Events, and Respiratory-Related Events, Complete Case Analysis

**eFigure 1.** CONSORT

**eFigure 2.** Residual Plot for Checking the Proportional Hazards Assumption for PRISm and Mortality, CHD Events, and Respiratory-Related Events

**eFigure 3.** Unadjusted Cumulative Incidence of All-Cause Mortality by Lung Function Category

**eFigure 4.** Unadjusted Cumulative Incidence of Respiratory- and Coronary Heart Disease (CHD) Mortality, and Respiratory-Related and CHD-Related Hospitalizations and Mortality by Lung Function Category

**eFigure 5.** Effects of Confounding Variables on Association Between PRISm and All-Cause Mortality

**eFigure 6.** Forest Plot of Stratified Subgroup Analyses (PRISm vs Normal Spirometry) for All-Cause Mortality

**eFigure 7.** Forest Plot of Stratified Subgroup Analyses (PRISm vs Normal Spirometry) for Respiratory Mortality

**eFigure 8.** Forest Plot of Stratified Subgroup Analyses (PRISm vs Normal Spirometry) for CHD Mortality Events

**eFigure 9.** Forest Plot of Stratified Subgroup Analyses (PRISm vs Normal Spirometry) for Respiratory-Related Events

**eFigure 10.** Forest Plot of Stratified Subgroup Analyses (PRISm vs Normal Spirometry) for CHD-Related Events

**eFigure 11.** Forest Plot of Cohort-Stratified Analyses (PRISm vs Normal Spirometry) for All-Cause Mortality

**eFigure 12.** Forest Plot of Cohort-Stratified Analyses (PRISm vs Normal Spirometry) for Respiratory Mortality

**eFigure 13.** Forest Plot of Cohort-Stratified Analyses (PRISm vs Normal Spirometry) for CHD Mortality

**eFigure 14.** Forest Plot of Cohort-Stratified Analyses (PRISm vs Normal Spirometry) for Respiratory-Related Events

**eFigure 15.** Forest Plot of Cohort-Stratified Analyses (PRISm vs Normal Spirometry) for CHD-Related Events

This supplemental material has been provided by the authors to give readers additional information about their work.

**eTable 1.** Characteristics of the Cohorts Included in the NHLBI Pooled Cohorts Study

| <b>Cohort</b>                                                   | <b>Sites</b>          | <b>Enrollment year</b>    | <b>Major eligibility criteria</b>                                          | <b>Self-reported fixed categories for race or race/ethnicity</b>                                                                                                                                                              | <b>Censoring year for events / Median follow-up in years (Q1, Q3)</b> |
|-----------------------------------------------------------------|-----------------------|---------------------------|----------------------------------------------------------------------------|-------------------------------------------------------------------------------------------------------------------------------------------------------------------------------------------------------------------------------|-----------------------------------------------------------------------|
| Atherosclerosis Risk in Communities Study (ARIC)                | Forsyth County, NC    | 1987-89                   | Age 45 -64 years                                                           | American Indian<br>Black<br>East Asian/Pacific Islanders<br>White                                                                                                                                                             | 2018<br><br>26.5<br>(18.5, 28.1)                                      |
|                                                                 | Jackson, MS           |                           |                                                                            |                                                                                                                                                                                                                               |                                                                       |
|                                                                 | Minneapolis, MN       |                           |                                                                            |                                                                                                                                                                                                                               |                                                                       |
|                                                                 | Washington County, MD |                           |                                                                            |                                                                                                                                                                                                                               |                                                                       |
| Coronary Artery Risk Development in Young Adults Study (CARDIA) | Chicago, IL           | 1985-1986                 | Age 18 – 30 years                                                          | Black<br>White                                                                                                                                                                                                                | 2018<br><br>29.3<br>(28.2, 30.0)                                      |
|                                                                 | Oakland, CA           |                           |                                                                            |                                                                                                                                                                                                                               |                                                                       |
|                                                                 | Birmingham, AL        |                           |                                                                            |                                                                                                                                                                                                                               |                                                                       |
|                                                                 | Minneapolis, MN       |                           |                                                                            |                                                                                                                                                                                                                               |                                                                       |
| Cardiovascular Health Study (CHS)                               | Pittsburgh, PA        | 1989-90                   | Age 65 + years                                                             | American Indian<br>Black<br>East Asian/Pacific Islanders<br>White<br>Others                                                                                                                                                   | 2018<br><br>13.2<br>(7.8, 18.1)                                       |
|                                                                 | Winston-Salem, NC     | 1992-93                   |                                                                            |                                                                                                                                                                                                                               |                                                                       |
|                                                                 | Sacramento, CA        | (African American cohort) |                                                                            |                                                                                                                                                                                                                               |                                                                       |
|                                                                 | Hagerstown, MD        |                           |                                                                            |                                                                                                                                                                                                                               |                                                                       |
| Framingham Offspring Cohort (FOC)                               | Framingham, MA        | 1971–1975                 | Offspring of the Framingham heart Study- Original Cohort and their spouses | The FOC study was conducted in offspring of the original Framingham Heart Study cohort, which was exclusively non-Hispanic White race. No question separate question regarding race/ethnicity was administered at enrollment. | 2018<br><br>21.8<br>(17.0, 26.2)                                      |
| Health, Aging, and Body Composition (Health ABC) Study          | Pittsburgh, PA        | 1997-98                   | Age 70 – 79 years                                                          | Black<br>East Asian/Pacific Islanders<br>Hispanic/Latino<br>White                                                                                                                                                             | 2014<br><br>12.5<br>(7.8, 16.4)                                       |
|                                                                 | Memphis, TN           |                           |                                                                            |                                                                                                                                                                                                                               |                                                                       |
|                                                                 | San Francisco, CA     |                           |                                                                            |                                                                                                                                                                                                                               |                                                                       |

| Cohort                                                       | Sites         | Enrollment year | Major eligibility criteria | Self-reported fixed categories for race or race/ethnicity                                                                                                                                                                                                                                                                                                                                                                                                                                                                                                                                                                                                                                                                                                                                                                                                                                                                          | Censoring year for events / Median follow-up in years (Q1, Q3) |
|--------------------------------------------------------------|---------------|-----------------|----------------------------|------------------------------------------------------------------------------------------------------------------------------------------------------------------------------------------------------------------------------------------------------------------------------------------------------------------------------------------------------------------------------------------------------------------------------------------------------------------------------------------------------------------------------------------------------------------------------------------------------------------------------------------------------------------------------------------------------------------------------------------------------------------------------------------------------------------------------------------------------------------------------------------------------------------------------------|----------------------------------------------------------------|
| Hispanic Community Health Study/ Study of Latinos (HCHS/SOL) | San Diego, CA | 2008-11         | Age 18 – 74 years          | <p>Two separate questions were administered at the enrollment describing Hispanic/Latino heritage and race:</p> <p><b>1. Hispanic/Latino heritage:</b></p> <ul style="list-style-type: none"> <li>i) Dominican/ Dominican descent</li> <li>ii) Central American/ Central American descent</li> <li>iii) Cuban/ Cuban descent</li> <li>iv) Mexican/ Mexican descent</li> <li>v) Puerto Rican/ Puerto Rican descent</li> <li>vi) South American/ South American descent</li> <li>vii) More than one heritage</li> <li>viii) Other</li> </ul> <p><b>2) Race:</b></p> <ul style="list-style-type: none"> <li>i) White</li> <li>ii) Black or African American</li> <li>iii) Asian</li> <li>iv) American Indian/Alaskan Native</li> <li>v) Native Hawaiian/ Pacific Islander</li> <li>vi) More than one race</li> </ul> <p>For the purposes of this paper, all participants were considered to be of Hispanic/Latino race/ethnicity.</p> | Data not available                                             |
|                                                              | Chicago, IL   |                 |                            |                                                                                                                                                                                                                                                                                                                                                                                                                                                                                                                                                                                                                                                                                                                                                                                                                                                                                                                                    |                                                                |
|                                                              | Bronx, NY     |                 |                            |                                                                                                                                                                                                                                                                                                                                                                                                                                                                                                                                                                                                                                                                                                                                                                                                                                                                                                                                    |                                                                |
|                                                              | Miami, FL     |                 |                            |                                                                                                                                                                                                                                                                                                                                                                                                                                                                                                                                                                                                                                                                                                                                                                                                                                                                                                                                    |                                                                |

| <b>Cohort</b>                                | <b>Sites</b>                  | <b>Enrollment year</b> | <b>Major eligibility criteria</b>                                                       | <b>Self-reported fixed categories for race or race/ethnicity</b>                                                                                                    | <b>Censoring year for events / Median follow-up in years (Q1, Q3)</b> |
|----------------------------------------------|-------------------------------|------------------------|-----------------------------------------------------------------------------------------|---------------------------------------------------------------------------------------------------------------------------------------------------------------------|-----------------------------------------------------------------------|
| Jackson Heart Study (JHS)                    | Jackson, MS                   | 2000-04                | Age 20 – 95 years                                                                       | The JHS was conducted exclusively in Black participants. No question separate question regarding race/ethnicity was administered at enrollment.                     | 2016<br>13.8<br>(13.1, 14.5)                                          |
| Multi-Ethnic Study of Atherosclerosis (MESA) | Winston-Salem, NC             | 2000-02                | Age 45-84 years<br>Participants required to be free of clinical cardiovascular disease. | Black<br>East Asian (Chinese)/Pacific Islanders<br>Hispanic/Latino<br>White                                                                                         | 2018<br>11.2<br>(6.9, 12.1)                                           |
|                                              | Upper Manhattan/Bronx, NY     |                        |                                                                                         |                                                                                                                                                                     |                                                                       |
|                                              | Los Angeles, CA               |                        |                                                                                         |                                                                                                                                                                     |                                                                       |
|                                              | Baltimore, MD                 |                        |                                                                                         |                                                                                                                                                                     |                                                                       |
|                                              | Chicago, IL                   |                        |                                                                                         |                                                                                                                                                                     |                                                                       |
| Minneapolis, MN                              |                               |                        |                                                                                         |                                                                                                                                                                     |                                                                       |
| Strong Heart Study (SHS)                     | Phoenix, AZ                   | 1989-91                | Age 45 – 74 years                                                                       | The SHS was conducted exclusively in participants of American Indian origin. No question separate question regarding race/ethnicity was administered at enrollment. | 2016<br>19.2<br>(10.5, 22.1)                                          |
|                                              | Southwestern OK               |                        |                                                                                         |                                                                                                                                                                     |                                                                       |
|                                              | Western and central ND and SD |                        |                                                                                         |                                                                                                                                                                     |                                                                       |

**eTable 2.** Classification of Coronary Heart Disease (CHD) and Respiratory Mortality and Events

| Events                          | Definitions                                                                                                                                                                                                                                                                                                                                                                                                                                                                                                                                                                                                                                                                                                                                                                                                                                                                                                                                                                                                                                                                                                                                                                                                                                                                                                                                                                                                                                                                                                                                                                                                                                                                                                                                                                                         |
|---------------------------------|-----------------------------------------------------------------------------------------------------------------------------------------------------------------------------------------------------------------------------------------------------------------------------------------------------------------------------------------------------------------------------------------------------------------------------------------------------------------------------------------------------------------------------------------------------------------------------------------------------------------------------------------------------------------------------------------------------------------------------------------------------------------------------------------------------------------------------------------------------------------------------------------------------------------------------------------------------------------------------------------------------------------------------------------------------------------------------------------------------------------------------------------------------------------------------------------------------------------------------------------------------------------------------------------------------------------------------------------------------------------------------------------------------------------------------------------------------------------------------------------------------------------------------------------------------------------------------------------------------------------------------------------------------------------------------------------------------------------------------------------------------------------------------------------------------|
| CHD hospitalizations/ mortality | <ul style="list-style-type: none"> <li>• Coronary heart disease (CHD) events data were available in all cohorts except HCHS/SOL.</li> <li>• In all cohorts, all potential clinical CHD events were reviewed and adjudicated by the physicians in the endpoints review committee.</li> <li>• Participants were diagnosed as having developed CHD if upon review of the case the review committee agrees on one of the following definite manifestations of CHD: myocardial infarction, coronary insufficiency, angina pectoris, sudden death from CHD, non-sudden death from CHD.</li> <li>• For hospitalized events, a diagnosis of definite, probable, or silent myocardial infarction (MI) was made by trained abstractors or physician reviewers based on presenting symptoms, cardiac enzymes tests, and electrocardiograms (ECGs).</li> <li>• Out-of-hospital deaths, including deaths in emergency room, were investigated by death certificates and by interview with next-of-kin, and questionnaire completed by the patient’s physicians.</li> <li>• Incident cases had at least one of the following newly developed manifestations: Fatal MI defined as definite MI within previous 4 weeks of death and no known non-atherosclerotic or non-cardiac atherosclerotic process or event that was likely to have been lethal.</li> <li>• Fatal coronary heart disease defined based on combinations of: (1) no known non-atherosclerotic or non-cardiac atherosclerotic process or event that was likely to have been lethal, (2) presence of chest pain, (3) history of CHD (MI or angina), and/or (4) ICD-9 codes 410-414, 427.5, 429.2 and/or 799 from death certificate; definite and probable MI identified by chest pain, ECG and/or enzymes; silent MI identified by ECG.</li> </ul> |
| Respiratory-related events      | <ul style="list-style-type: none"> <li>• Respiratory–related events were defined as hospitalizations or deaths for which chronic lower respiratory disease was classified as a primary, underlying, or contributing cause.</li> <li>• Respiratory-related events data were available in 4 cohorts- ARIC, CHS, HABC, and MESA.</li> <li>• In three cohorts (ARIC, CHS, and MESA), events were classified using International Classification of Diseases, Ninth Revision (ICD-9) and International Statistical Classification of Diseases and Related Health Problems, Tenth Revision (ICD-10) diagnosis codes for COPD [ICD-9: 496; ICD-10: J44], chronic bronchitis [ICD-9: 490-1; ICD-10; J40-2], and emphysema [ICD-9: 492; ICD-10: J43].</li> <li>• In HABC, events were prospectively ascertained and adjudicated for COPD hospitalizations.</li> </ul>                                                                                                                                                                                                                                                                                                                                                                                                                                                                                                                                                                                                                                                                                                                                                                                                                                                                                                                                         |
| Respiratory mortality           | <ul style="list-style-type: none"> <li>• Respiratory mortality data were available in 6 cohorts- ARIC, CHS, CARDIA, HABC, MESA, and SHS.</li> <li>• Respiratory disease–related deaths were defined by adjudication or administrative criteria (ICD-10: J1-J99).</li> </ul>                                                                                                                                                                                                                                                                                                                                                                                                                                                                                                                                                                                                                                                                                                                                                                                                                                                                                                                                                                                                                                                                                                                                                                                                                                                                                                                                                                                                                                                                                                                         |

**eTable 3.** Comparison Between Nonimputed and Imputed Datasets for All-Cause Mortality Analyses

|                                                | <b>Non-imputed</b> | <b>Imputed</b>   |
|------------------------------------------------|--------------------|------------------|
| N                                              | 53,701             | 53,701           |
| Age, mean (SD)                                 | 53.2 (15.8)        | 53.2 (15.8)      |
| Missing                                        | 0                  |                  |
| Sex, N (%)                                     |                    |                  |
| Female                                         | 30,288 (56.4)      | 30,288 (56.4)    |
| Male                                           | 23,413 (43.6)      | 23,413 (43.6)    |
| Missing                                        | 0                  |                  |
| Race, N (%)                                    |                    |                  |
| American Indian                                | 1,779 (3.3)        | 1,779 (3.3)      |
| Black / African American                       | 11,672 (21.7)      | 11,672 (21.7)    |
| East Asian / Pacific Islander                  | 659 (1.2)          | 659 (1.2)        |
| Hispanic / Latino                              | 14,597 (27.2)      | 14,597 (27.2)    |
| Non-Hispanic White                             | 24,979 (46.5)      | 24,979 (46.5)    |
| Other <sup>a</sup>                             | 15 (0.03)          | 15 (0.03)        |
| Missing                                        | 0                  |                  |
| Education, N (%)                               |                    |                  |
| Less than high school                          | 7,806 (14.5)       | 7,856 (14.6)     |
| High school                                    | 14,499 (27.0)      | 14,739 (27.5)    |
| Some college                                   | 8,366 (15.6)       | 8,543 (15.9)     |
| College or more                                | 22,311 (41.6)      | 22,563 (42.0)    |
| Missing                                        | 719 (1.3)          |                  |
| Smoking Status, N (%)                          |                    |                  |
| Never                                          | 25,956 (48.3)      | 26,048 (48.5)    |
| Former                                         | 16,602 (30.9)      | 16,664 (31.0)    |
| Current                                        | 10,953 (20.4)      | 10,989 (20.5)    |
| Missing                                        | 190 (0.4)          |                  |
| Pack-years among ever smokers, median (Q1, Q3) | 15.6 (4.5, 34.0)   | 15.4 (4.5, 34.0) |
| Missing                                        | 943                |                  |
| Body Mass Index, mean (SD)                     | 28.1 (5.8)         | 28.1 (5.8)       |
| Missing                                        | 105                |                  |
| Co-morbidities, N (%)                          |                    |                  |
| Hypertension <sup>b</sup>                      |                    |                  |
| Yes                                            | 22,516 (41.9)      | 22,528 (42.0)    |
| No                                             | 31,167 (58.0)      | 31,173 (58.0)    |
| Missing                                        | 18 (0.03)          |                  |

|                                                | Non-imputed   | Imputed       |
|------------------------------------------------|---------------|---------------|
| Diabetes <sup>c</sup>                          |               |               |
| Yes                                            | 7,729 (14.4)  | 7,736 (14.4)  |
| No                                             | 45,944 (85.6) | 45,965 (85.6) |
| Missing                                        | 28 (0.1)      |               |
| Coronary heart disease <sup>d</sup>            |               |               |
| Yes                                            | 2,849 (5.3)   | 2,886 (5.4)   |
| No                                             | 50,621 (94.3) | 50,815 (94.6) |
| Missing                                        | 231 (0.4)     |               |
| Heart failure <sup>d</sup>                     |               |               |
| Yes                                            | 3,107 (5.8)   | 3,133 (5.8)   |
| No                                             | 50,425 (93.9) | 50,568 (94.2) |
| Missing                                        | 169 (0.3)     |               |
| Stroke <sup>d</sup>                            |               |               |
| Yes                                            | 859 (1.6)     | 945 (1.8)     |
| No                                             | 49,970 (93.1) | 52,756 (98.2) |
| Missing                                        | 2,872 (5.4)   |               |
| Asthma <sup>e</sup>                            |               |               |
| Yes                                            | 4,521 (8.4)   | 4,567 (8.5)   |
| No                                             | 48,838 (90.9) | 49,134 (91.5) |
| Missing                                        | 342 (0.6)     |               |
| Chronic lower respiratory disease <sup>f</sup> |               |               |
| Yes                                            | 6,042 (11.3)  | 6,059 (11.3)  |
| No                                             | 47,474 (88.4) | 47,642 (88.7) |
| Missing                                        | 185 (0.3)     |               |
| eGFR <sup>g</sup> , mean (SD)                  | 83.3 (239.2)  | 82.7 (213.2)  |
| Missing                                        | 11,179        |               |
| eGFR <sup>g</sup> categories, N (%)            |               |               |
| 60 + mL/min/1.73m <sup>2</sup>                 | 35,465 (66.0) | 44,669 (83.2) |
| 30-59 mL/min/1.73m <sup>2</sup>                | 6,773 (12.6)  | 8,686 (16.2)  |
| <30 mL/min/1.73m <sup>2</sup>                  | 284 (0.5)     | 346 (0.6)     |
| Missing                                        | 11,179 (20.8) |               |

<sup>a</sup> "Other" race category includes self-identified "other" or self-identified mixed race individuals

<sup>b</sup> Self-reported hypertension or systolic blood pressure  $\geq$  140 mmHg or diastolic blood pressure  $\geq$  90 mmHg or use of anti-hypertensive medications

<sup>c</sup> Self-reported diabetes or fasting blood sugar level  $\geq$  126 mg/dl or use of oral hypoglycemic agents or insulin

<sup>d</sup> Data on comorbidities at baseline, including coronary heart disease, congestive heart failure (HF), and stroke were self-reported. If missing, data was obtained from hospitalization records prior to baseline spirometry. In JHS, neither self-reported information on HF nor hospitalization records prior to baseline spirometry were available. Therefore, baseline HF was defined as HF events occurring within 5 years of baseline spirometry.

<sup>e</sup> Self-reported physician diagnosed asthma

<sup>f</sup> Self-reported physician diagnosed chronic obstructive pulmonary disease, chronic bronchitis, or emphysema

<sup>g</sup> For baseline eGFR, measurements obtained at baseline spirometry visit were used. If missing, first available eGFR measurements were used.

**eTable 4.** Age and Smoking-Adjusted Absolute Incidence Rates for Respiratory Mortality, Stratified by Cohort

|        | Number of events / at risk (Cum. Inc.) | Median follow-up in years (Q1, Q3) | IDR/1,000 person-years (95% CI) <sup>a</sup> |                        |                   | Difference in IDR /1,000 person-years (95% CI) p-value |                                 |
|--------|----------------------------------------|------------------------------------|----------------------------------------------|------------------------|-------------------|--------------------------------------------------------|---------------------------------|
|        |                                        |                                    | PRISm                                        | Obstructive Spirometry | Normal Spirometry | PRISm vs Normal Spirometry                             | PRISm vs Obstructive Spirometry |
| ARIC   | 14,843 / 6,928 (46.7)                  | 26.5 (18.5, 28.1)                  | 30.4 (27.8, 32.9)                            | 25.2 (24.0, 26.4)      | 17.8 (17.2, 18.3) | 12.6 (10.0, 15.2) <.001                                | 5.2 (2.4, 8.0) <.001            |
| CARDIA | 4,994 / 373 (7.5)                      | 29.3 (28.2, 30.0)                  | 7.0 (4.6, 9.4)                               | 3.4 (1.9, 4.9)         | 2.4 (2.2, 2.7)    | 4.5 (2.1, 7) <.001                                     | 3.6 (0.8, 6.4) 0.012            |
| CHS    | 4,812 / 3,786 (78.7)                   | 13.2 (7.8, 18.1)                   | 72.9 (64.8, 81)                              | 69.2 (65.8, 72.5)      | 51 (48.5, 53.4)   | 21.9 (13.5, 30.4) <.001                                | 3.7 (-5, 12.5) 0.41             |
| FOC    | 3,894 / 1,131 (29.0)                   | 21.8 (17.0, 26.2)                  | 23.6 (19.1, 28.1)                            | 14.7 (13, 16.3)        | 12.7 (11.7, 13.7) | 10.9 (6.3, 15.5) <.001                                 | 9 (4.2, 13.8) <.001             |
| HABC   | 2,578 / 1,575 (61.1)                   | 12.5 (7.8, 16.4)                   | 79.5 (66.9, 92.2)                            | 65.2 (59, 71.5)        | 45 (42.1, 47.9)   | 34.6 (21.6, 47.5) <.001                                | 14.3 (0.2, 28.4) 0.046          |
| JHS    | 2,498 / 261 (10.4)                     | 13.8 (13.1, 14.5)                  | 14 (9, 19.1)                                 | 13.4 (7.2, 19.5)       | 6.7 (5.7, 7.7)    | 7.4 (2.2, 12.6) 0.005                                  | 0.7 (-7.3, 8.7) 0.87            |
| MESA   | 4,463 / 632 (14.2)                     | 11.2 (6.9, 12.1)                   | 22.8 (17.2, 28.4)                            | 18.1 (15.6, 20.5)      | 12.8 (11.3, 14.2) | 10 (4.2, 15.8) <.001                                   | 4.7 (-1.4, 10.8) 0.13           |
| SHS    | 1,754 / 975 (55.6)                     | 19.2 (10.5, 22.1)                  | 55.7 (35.5, 75.8)                            | 39.2 (33.2, 45.2)      | 31.6 (29.1, 34)   | 24.1 (3.8, 44.4) 0.02                                  | 16.5 (-4.6, 37.5) 0.13          |

Lung function categories were defined as: PRISm = FEV<sub>1</sub>/FVC≥0.7, FEV<sub>1</sub><80%; Obstructive spirometry = FEV<sub>1</sub>/FVC<0.7; Normal spirometry= FEV<sub>1</sub>/FVC≥0.7, FEV<sub>1</sub>≥80%.

<sup>a</sup> Using the direct method and the observed age distribution across all 9 cohorts, age- and smoking-adjusted absolute incidence density rates, and their differences were calculated per 1,000 person-years for each lung function category.



**eTable 5.** Age and Smoking-Adjusted Absolute Incidence Rates for Respiratory Mortality, Stratified by Cohort

|                     | Number of events / at risk (Cum. Inc.) | Median follow-up in years (Q1, Q3) | IDR/1,000 person-years (95% CI) <sup>a</sup> |                        |                   | Difference in IDR /1,000 person-years (95% CI) p-value |                                 |
|---------------------|----------------------------------------|------------------------------------|----------------------------------------------|------------------------|-------------------|--------------------------------------------------------|---------------------------------|
|                     |                                        |                                    | PRISm                                        | Obstructive Spirometry | Normal Spirometry | PRISm vs Normal spirometry                             | PRISm vs Obstructive spirometry |
| ARIC                | 472 / 13,398 (3.5)                     | 25.8 (17.7, 28.0)                  | 1.6 (1.0, 2.2)                               | 3.3 (2.9, 3.7)         | 0.7 (0.6, 0.8)    | 0.9 (0.3, 1.6) 0.003                                   | -1.7 (-2.4, -1) <.001           |
| CARDIA <sup>b</sup> | 14 / 4,994 (0.3)                       | 29.3 (28.2, 30.0)                  | -                                            | 0.5 (-0.2, 1.1)        | 0.1 (0, 0.1)      | -                                                      | -                               |
| CHS                 | 402 / 4,812 (8.4)                      | 13.2 (7.8, 18.1)                   | 7.1 (4.6, 9.7)                               | 9.3 (8.1, 10.5)        | 3.7 (3.1, 4.4)    | 3.4 (0.7, 6.1) 0.012                                   | -2.2 (-5.0, 0.6) 0.13           |
| HABC                | 94 / 2,578 (3.7)                       | 12.5 (7.8, 16.4)                   | 5.6 (2.1, 9.1)                               | 6.7 (4.9, 8.6)         | 1.3 (0.9, 1.8)    | 4.3 (0.7, 7.8) 0.019                                   | -1.1 (-5.1, 2.8) 0.58           |
| MESA                | 28 / 4,462 (0.6)                       | 11.2 (6.9, 12.1)                   | 1.6 (0.0, 3.2)                               | 1.1 (0.5, 1.6)         | 0.3 (0.1, 0.6)    | 1.2 (-0.4, 2.9) 0.13                                   | 0.5 (-1.2, 2.2) 0.55            |
| SHS                 | 90 / 1,754 (5.1)                       | 19.2 (10.5, 22.1)                  | 2.7 (0.8, 4.6)                               | 4.5 (2.7, 6.3)         | 2.7 (2, 3.5)      | 0.0 (-2.1, 2.0) 0.97                                   | -1.8 (-4.4, 0.8) 0.17           |

Lung function categories were defined as: PRISm = FEV<sub>1</sub>/FVC≥0.7, FEV<sub>1</sub><80%; Obstructive spirometry = FEV<sub>1</sub>/FVC<0.7; Normal spirometry= FEV<sub>1</sub>/FVC≥0.7, FEV<sub>1</sub>≥80%.

<sup>a</sup> Using the direct method and the observed age distribution across all 9 cohorts, age- and smoking-adjusted absolute incidence density rates, and their differences were calculated per 1,000 person-years for each lung function category.

<sup>b</sup> No respiratory deaths reported in individuals with PRISm.

**eTable 6.** Age and Smoking-Adjusted Absolute Incidence Rates for Coronary Heart Disease (CHD) Mortality, Stratified by Cohort

|                  | Number of events / at risk (Cum. Inc.) | Median follow-up in years (Q1, Q3) | IDR/1,000 person-years (95% CI) <sup>a</sup> |                        |                   | Difference in IDR /1,000 person-years (95% CI) p-value |                                 |
|------------------|----------------------------------------|------------------------------------|----------------------------------------------|------------------------|-------------------|--------------------------------------------------------|---------------------------------|
|                  |                                        |                                    | PRISm                                        | Obstructive Spirometry | Normal Spirometry | PRISm vs Normal Spirometry                             | PRISm vs Obstructive Spirometry |
| ARIC             | 623 / 14,843 (4.2)                     | 26.5 (18.5, 28.1)                  | 4.1 (3.2, 5.1)                               | 2.0 (1.7, 2.3)         | 1.6 (1.4, 1.7)    | 2.6 (1.6, 3.5) <.001                                   | 2.2 (1.2, 3.1) <.001            |
| CARDIA           | 16 / 4,994 (0.3)                       | 29.3 (28.2, 30.0)                  | 0.7 (-0.1, 1.4)                              | 0.5 (-0.1, 1.1)        | 0.1 (0.0, 0.1)    | 0.6 (-0.2, 1.4) 0.13                                   | 0.1 (-0.8, 1.1) 0.77            |
| CHS              | 942 / 4,812 (19.6)                     | 13.2 (7.8, 18.1)                   | 17.5 (13.6, 21.4)                            | 17.6 (15.9, 19.3)      | 12.6 (11.4, 13.8) | 4.9 (0.8, 9.0) 0.02                                    | -0.1 (-4.4, 4.2) 0.95           |
| FOC              | 108 / 3,894 (2.8)                      | 21.8 (17.0, 26.2)                  | 3.5 (1.9, 5.2)                               | 1.0 (0.6, 1.5)         | 1.3 (1.0, 1.6)    | 2.3 (0.6, 4.0) 0.01                                    | 2.5 (0.8, 4.2) 0.004            |
| HABC             | 346 / 2,578 (13.4)                     | 12.5 (7.8, 16.4)                   | 17.8 (11.9, 23.8)                            | 12.6 (9.9, 15.3)       | 10.4 (9.0, 11.7)  | 7.5 (1.4, 13.6) 0.02                                   | 5.2 (-1.3, 11.7) 0.12           |
| JHS <sup>b</sup> | 9 / 2,291 (0.4)                        | 13.8 (13.1, 14.5)                  | 0.8 (0.0, 1.6)                               | -                      | 0.3 (0.0, 0.5)    | 0.5 (-0.3, 1.4) 0.21                                   | -                               |
| MESA             | 68 / 4,462 (1.5)                       | 11.2 (6.9, 12.1)                   | 2.7 (0.8, 4.7)                               | 1.5 (0.8, 2.1)         | 1.5 (1.0, 2.0)    | 1.2 (-0.8, 3.2) 0.24                                   | 1.2 (-0.8, 3.3) 0.24            |
| SHS              | 240 / 17,54 (13.7)                     | 19.2 (10.5, 22.1)                  | 12.5 (8.6, 16.5)                             | 8.0 (5.3, 10.8)        | 7.9 (6.7, 9.1)    | 4.6 (0.5, 8.8) 0.028                                   | 4.5 (-0.3, 9.3) 0.07            |

Lung function categories were defined as: PRISm = FEV<sub>1</sub>/FVC≥0.7, FEV<sub>1</sub><80%; Obstructive spirometry = FEV<sub>1</sub>/FVC<0.7; Normal spirometry= FEV<sub>1</sub>/FVC≥0.7, FEV<sub>1</sub>≥80%.

<sup>a</sup> Using the direct method and the observed age distribution across all 9 cohorts, age- and smoking-adjusted absolute incidence density rates, and their differences were calculated per 1,000 person-years for each lung function category.

<sup>b</sup> No CHD deaths reported in individuals with Obstructive spirometry.

**eTable 7.** Age and Smoking-Adjusted Absolute Incidence Rates for Respiratory-Related Events, Stratified by Cohort

|      | Number of events / at risk (Cum. Inc.) | Median follow-up in years (Q1, Q3) | IDR/1,000 person-years (95% CI) <sup>a</sup> |                        |                   | Difference in IDR /1,000 person-years (95% CI) p-value |                                 |
|------|----------------------------------------|------------------------------------|----------------------------------------------|------------------------|-------------------|--------------------------------------------------------|---------------------------------|
|      |                                        |                                    | PRISm                                        | Obstructive Spirometry | Normal Spirometry | PRISm vs Normal Spirometry                             | PRISm vs Obstructive Spirometry |
| ARIC | 2,476 / 13,373 (18.5)                  | 21.3 (13.5, 26.3)                  | 12.3 (10.6, 13.9)                            | 18.1 (17.1, 19.2)      | 5.7 (5.3, 6.1)    | 6.6 (4.9, 8.2) <.001                                   | -5.9 (-7.8, -3.9) <.001         |
| CHS  | 1,172 / 4,756 (24.6)                   | 11.9 (6.4, 18.1)                   | 16.8 (13, 20.6)                              | 33.1 (30.7, 35.5)      | 10.7 (9.5, 11.8)  | 6.2 (2.2, 10.1) 0.002                                  | -16.2 (-20.8, -11.7) <.001      |
| HABC | 288 / 2,567 (11.2)                     | 12.2 (7.0, 16.3)                   | 12.6 (7.9, 17.4)                             | 23.9 (20.1, 27.8)      | 4.7 (3.7, 5.7)    | 7.9 (3.1, 12.8) 0.001                                  | -11.3 (-17.4, -5.2) <.001       |
| MESA | 165 / 4,384 (3.8)                      | 11.2 (6.7, 12.0)                   | 7.3 (4.1, 10.5)                              | 7.7 (6, 9.3)           | 2.1 (1.5, 2.6)    | 5.2 (2.0, 8.5) 0.002                                   | -0.4 (-4, 3.2) 0.83             |

Lung function categories were defined as: PRISm = FEV<sub>1</sub>/FVC≥0.7, FEV<sub>1</sub><80%; Obstructive spirometry = FEV<sub>1</sub>/FVC<0.7; Normal spirometry= FEV<sub>1</sub>/FVC≥0.7, FEV<sub>1</sub>≥80%.

<sup>a</sup> Using the direct method and the observed age distribution across all 9 cohorts, age- and smoking-adjusted absolute incidence density rates, and their differences were calculated per 1,000 person-years for each lung function category.

**eTable 8.** Age and Smoking-Adjusted Absolute Incidence Rates for Coronary Heart Disease (CHD)-Related Events, Stratified by Cohort

|        | Number of events / at risk (Cum. Inc.) | Median follow-up in years (Q1, Q3) | IDR/1,000 person-years (95% CI) <sup>a</sup> |                        |                   | Difference in IDR /1,000 person-years (95% CI) p-value |                                 |
|--------|----------------------------------------|------------------------------------|----------------------------------------------|------------------------|-------------------|--------------------------------------------------------|---------------------------------|
|        |                                        |                                    | PRISm                                        | Obstructive Spirometry | Normal Spirometry | PRISm vs Normal Spirometry                             | PRISm vs Obstructive Spirometry |
| ARIC   | 2,454 / 14,830 (16.6)                  | 26.5 (18.5, 28.1)                  | 13.2 (11.4, 14.9)                            | 8.7 (8.0, 9.5)         | 6.7 (6.4, 7.1)    | 6.4 (4.7, 8.2) <.001                                   | 4.4 (2.6, 6.3) <.001            |
| CARDIA | 102 / 4,993 (2.0)                      | 29.3 (28.2, 30.0)                  | 1.7 (0.5, 2.9)                               | 0.7 (0.0, 1.3)         | 0.7 (0.6, 0.8)    | 1.0 (-0.2, 2.2) 0.10                                   | 1.0 (-0.3, 2.4) 0.14            |
| CHS    | 1,452 / 3,829 (37.9)                   | 14.2 (8.5, 18.5)                   | 34.1 (27.7, 40.5)                            | 35.9 (33.0, 38.9)      | 27.7 (25.7, 29.8) | 6.3 (-0.4, 13.0) 0.06                                  | -1.9 (-8.9, 5.2) 0.60           |
| FOC    | 483 / 3,680 (13.1)                     | 21.9 (17.5, 26.5)                  | 10.0 (7.1, 12.9)                             | 6.5 (5.2, 7.8)         | 6.4 (5.7, 7.1)    | 3.6 (0.6, 6.6) 0.02                                    | 3.5 (0.3, 6.7) 0.03             |
| HABC   | 341 / 2,347 (14.5)                     | 12.5 (7.8, 16.4)                   | 18.7 (12.2, 25.2)                            | 14.0 (11.0, 17.0)      | 11.4 (9.9, 12.9)  | 7.3 (0.6, 14.0) 0.03                                   | 4.7 (-2.4, 11.9) 0.20           |
| JHS    | 64 / 2,291 (2.8)                       | 13.8 (13.1, 14.5)                  | 3.0 (1.4, 4.6)                               | 4.8 (-0.1, 9.8)        | 2.1 (1.5, 2.8)    | 0.9 (-0.9, 2.6) 0.33                                   | -1.8 (-7.1, 3.4) 0.49           |
| MESA   | 185 / 4,401 (4.2)                      | 11.2 (6.9, 12.1)                   | 8.6 (5.1, 12.1)                              | 4.6 (3.2, 5.9)         | 4.1 (3.3, 4.9)    | 4.5 (0.9, 8.1) 0.02                                    | 4.0 (0.2, 7.8) 0.04             |
| SHS    | 471 / 1,697 (27.8)                     | 19.6 (10.6, 22.1)                  | 21.3 (15.7, 27.0)                            | 17.8 (13.4, 22.1)      | 18.9 (16.9, 20.9) | 2.5 (-3.6, 8.5) 0.42                                   | 3.6 (-3.6, 10.7) 0.33           |

Lung function categories were defined as: PRISm = FEV<sub>1</sub>/FVC≥0.7, FEV<sub>1</sub><80%; Obstructive spirometry = FEV<sub>1</sub>/FVC<0.7; Normal spirometry= FEV<sub>1</sub>/FVC≥0.7, FEV<sub>1</sub>≥80%.

<sup>a</sup> Using the direct method and the observed age distribution across all 9 cohorts, age- and smoking-adjusted absolute incidence density rates, and their differences were calculated per 1,000 person-years for each lung function category.

**eTable 9.** Baseline Characteristics of Subjects by Lower Limit of Normal (LLN)-Defined Lung Function Categories

|                                  | <b>Total</b>  | <b>PRISm-LLN<br/>(FEV<sub>1</sub>/FVC ≥<br/>LLN<br/>&amp; FEV<sub>1</sub>&lt; LLN)</b> | <b>Obstructive Spirometry-LLN<br/>FEV<sub>1</sub>/FVC &lt; LLN</b> | <b>Normal<br/>Spirometry-<br/>LLN<br/>(FEV<sub>1</sub>/FVC ≥<br/>LLN<br/>&amp; FEV<sub>1</sub>≥ LLN)</b> |
|----------------------------------|---------------|----------------------------------------------------------------------------------------|--------------------------------------------------------------------|----------------------------------------------------------------------------------------------------------|
| N (row %)                        | 53,701        | 3,065 (5.7)                                                                            | 7,720 (14.4)                                                       | 42,916 (79.9)                                                                                            |
| Age, mean (SD)                   | 53.2 (15.8)   | 54.9 (14.2)                                                                            | 63.0 (12.0)                                                        | 50.7 (15.9)                                                                                              |
| Age group, N (%)                 |               |                                                                                        |                                                                    |                                                                                                          |
| < 30 years                       | 6,558 (12.2)  | 372 (12.1)                                                                             | 663 (8.6)                                                          | 5,523 (12.9)                                                                                             |
| 30-39 years                      | 3,493 (6.5)   | 174 (5.7)                                                                              | 279 (3.6)                                                          | 3,040 (7.1)                                                                                              |
| 40-49 years                      | 8,599 (16.0)  | 533 (17.4)                                                                             | 979 (12.7)                                                         | 7,087 (16.5)                                                                                             |
| 50-59 years                      | 15,358 (28.6) | 897 (28.3)                                                                             | 2,334 (30.2)                                                       | 12,127 (28.3)                                                                                            |
| 60-69 years                      | 10,714 (20.0) | 569 (18.6)                                                                             | 2,012 (26.1)                                                       | 8,133 (19.0)                                                                                             |
| 70-79 years                      | 7,311 (13.6)  | 430 (14.0)                                                                             | 1,178 (15.3)                                                       | 5,703 (13.3)                                                                                             |
| >80 years                        | 1,668 (3.1)   | 90 (2.9)                                                                               | 275 (3.6)                                                          | 1,303 (3.0)                                                                                              |
| Sex, N (%)                       |               |                                                                                        |                                                                    |                                                                                                          |
| Female                           | 30,288 (56.4) | 1,832 (59.8)                                                                           | 3,746 (48.5)                                                       | 24,710 (57.6)                                                                                            |
| Male                             | 23,413 (43.6) | 1,233 (40.2)                                                                           | 3,974 (51.5)                                                       | 18,206 (42.4)                                                                                            |
| Race, N (%)                      |               |                                                                                        |                                                                    |                                                                                                          |
| American Indian / Alaskan Native | 1,779 (3.3)   | 106 (3.5)                                                                              | 231 (3.0)                                                          | 1,442 (3.4)                                                                                              |
| Black                            | 11,672 (21.7) | 1,844 (60.2)                                                                           | 1,336 (17.3)                                                       | 8,492 (19.8)                                                                                             |
| East Asian / Pacific Islander    | 659 (1.2)     | 52 (1.7)                                                                               | 75 (1.0)                                                           | 532 (1.2)                                                                                                |
| Hispanic/Latino                  | 14,597 (27.2) | 543 (17.7)                                                                             | 1,129 (14.6)                                                       | 12,925 (30.1)                                                                                            |
| non-Hispanic White               | 24,979 (46.5) | 519 (16.9)                                                                             | 4,948 (64.1)                                                       | 18,512 (45.5)                                                                                            |
| Other                            | 15 (0.03)     | 1 (0.03)                                                                               | 1 (0.03)                                                           | 13 (0.03)                                                                                                |
| Education, N (%) <sup>a</sup>    |               |                                                                                        |                                                                    |                                                                                                          |
| Less than high school            | 7,856 (14.6)  | 513 (16.7)                                                                             | 1,229 (15.9)                                                       | 6,117 (14.3)                                                                                             |
| High school                      | 14,739 (27.5) | 762 (24.9)                                                                             | 2,180 (28.2)                                                       | 11,803 (27.5)                                                                                            |
| Some college                     | 8,543 (15.9)  | 478 (15.6)                                                                             | 1,158 (15.0)                                                       | 6,919 (16.1)                                                                                             |
| College or more                  | 22,563 (42.0) | 1,312 (42.8)                                                                           | 3,153 (40.8)                                                       | 18,076 (42.1)                                                                                            |

|                                                  | <b>Total</b>     | <b>PRISm-LLN<br/>(FEV<sub>1</sub>/FVC ≥<br/>LLN<br/>&amp; FEV<sub>1</sub> &lt; LLN)</b> | <b>Obstructive spirometry-LLN<br/>FEV<sub>1</sub>/FVC &lt; LLN</b> | <b>Normal<br/>Spirometry-<br/>LLN<br/>(FEV<sub>1</sub>/FVC ≥<br/>LLN<br/>&amp; FEV<sub>1</sub> ≥ LLN)</b> |
|--------------------------------------------------|------------------|-----------------------------------------------------------------------------------------|--------------------------------------------------------------------|-----------------------------------------------------------------------------------------------------------|
| Smoking Status, N (%) <sup>a</sup>               |                  |                                                                                         |                                                                    |                                                                                                           |
| Never                                            | 26,048 (48.5)    | 1,478 (48.2)                                                                            | 2,057 (26.6)                                                       | 22,513 (52.5)                                                                                             |
| Ever                                             | 27,653 (51.5)    | 1,588 (51.7)                                                                            | 5,663 (73.4)                                                       | 20,403 (47.5)                                                                                             |
| Current smokers among ever smokers               | 10,989 (39.7)    | 784 (49.4)                                                                              | 2,843 (50.2)                                                       | 7,364 (36.1)                                                                                              |
|                                                  |                  |                                                                                         |                                                                    |                                                                                                           |
| Pack-years among ever smokers,<br>median (Q1,Q3) | 15.4 (4.5, 34.0) | 18.0 (6.0, 36.2)                                                                        | 30.9 (13.2, 48.0)                                                  | 12.0 (3.5, 29.0)                                                                                          |
|                                                  |                  |                                                                                         |                                                                    |                                                                                                           |
| Body Mass Index, mean (SD) <sup>a</sup>          | 28.1 (5.8)       | 30.8 (7.6)                                                                              | 26.6 (5.2)                                                         | 28.2 (5.7)                                                                                                |
|                                                  |                  |                                                                                         |                                                                    |                                                                                                           |
| FEV <sub>1</sub> % predicted, mean (SD)          | 97.0 (18.2)      | 75.1 (9.4)                                                                              | 80.6 (20.4)                                                        | 103.4 (13.4)                                                                                              |
| FVC % predicted, mean (SD)                       | 102.1 (17.1)     | 78.1 (11.4)                                                                             | 100.3 (20.1)                                                       | 105.4 (14.4)                                                                                              |
|                                                  |                  |                                                                                         |                                                                    |                                                                                                           |
| Co-morbidities, N (%) <sup>a</sup>               |                  |                                                                                         |                                                                    |                                                                                                           |
| Hypertension <sup>b</sup>                        | 22,528 (42.0)    | 1,828 (59.6)                                                                            | 3,477 (45.0)                                                       | 17,225 (40.1)                                                                                             |
| Diabetes <sup>c</sup>                            | 7,736 (14.4)     | 757 (24.7)                                                                              | 856 (11.1)                                                         | 6,123 (14.3)                                                                                              |
| Chronic lower respiratory disease <sup>d</sup>   | 6,059 (11.3)     | 510 (16.6)                                                                              | 1,822 (23.6)                                                       | 3,737 (8.7)                                                                                               |
| Asthma <sup>e</sup>                              | 4,567 (8.5)      | 387 (12.6)                                                                              | 1,268 (16.4)                                                       | 2,922 (6.8)                                                                                               |
| Heart failure <sup>f</sup>                       | 3,133 (5.8)      | 251 (8.2)                                                                               | 788 (10.2)                                                         | 2,094 (4.9)                                                                                               |
| Coronary heart disease <sup>f</sup>              | 2,886 (5.4)      | 252 (8.2)                                                                               | 608 (7.9)                                                          | 2,025 (4.7)                                                                                               |
| Stroke <sup>f</sup>                              | 945 (1.8)        | 124 (4.0)                                                                               | 177 (2.4)                                                          | 639 (1.5)                                                                                                 |
|                                                  |                  |                                                                                         |                                                                    |                                                                                                           |
| eGFR <sup>g</sup> (mL/min/1.73m <sup>2</sup> )   |                  |                                                                                         |                                                                    |                                                                                                           |
| ≥60                                              | 44,669 (83.2)    | 2,636 (86.0)                                                                            | 6,098 (79.0)                                                       | 35,824 (83.5)                                                                                             |
| 30-59                                            | 8,686 (16.2)     | 387 (12.6)                                                                              | 1,562 (20.2)                                                       | 6,835 (15.9)                                                                                              |
| <30                                              | 364 (0.6)        | 42 (1.4)                                                                                | 60 (0.8)                                                           | 258 (0.6)                                                                                                 |
|                                                  |                  |                                                                                         |                                                                    |                                                                                                           |
|                                                  | <b>Total</b>     | <b>PRISm-LLN</b>                                                                        | <b>Obstructive spirometry-LLN</b>                                  | <b>Normal</b>                                                                                             |

|                   |        | (FEV <sub>1</sub> /FVC ≥ LLN & FEV <sub>1</sub> < LLN) | FEV <sub>1</sub> /FVC < LLN | Spirometry-LLN (FEV <sub>1</sub> /FVC ≥ LLN & FEV <sub>1</sub> ≥ LLN) |
|-------------------|--------|--------------------------------------------------------|-----------------------------|-----------------------------------------------------------------------|
| Cohort, N (row %) |        |                                                        |                             |                                                                       |
| ARIC              | 14,944 | 693 (4.6)                                              | 3,044 (20.4)                | 11,207 (75)                                                           |
| HCHS/SOL          | 13,625 | 506 (3.7)                                              | 1,044 (7.7)                 | 12,075 (88.6)                                                         |
| CARDIA            | 5,004  | 353 (7.1)                                              | 578 (11.6)                  | 4,073 (81.4)                                                          |
| CHS               | 4,814  | 261 (5.4)                                              | 1,069 (22.2)                | 3,484 (72.4)                                                          |
| MESA              | 4,585  | 305 (6.7)                                              | 587 (12.8)                  | 3,693 (80.5)                                                          |
| FOC               | 3,898  | 85 (2.2)                                               | 768 (19.7)                  | 3,045 (78.1)                                                          |
| HABC              | 2,578  | 149 (5.8)                                              | 284 (11.0)                  | 2,145 (83.2)                                                          |
| JHS               | 2,498  | 609 (24.4)                                             | 121 (4.8)                   | 1,768 (70.8)                                                          |
| SHS               | 1,755  | 104 (5.9)                                              | 225 (12.8)                  | 1,426 (81.3)                                                          |

Data is represented as N (column %), or mean SD (standard deviation, SD), or median (interquartile range, denoted as Q1, Q3) unless otherwise noted

FEV<sub>1</sub> = Forced expiratory volume in one second; FVC = Forced vital capacity; eGFR = estimated glomerular filtration rate

ARIC = Atherosclerosis Risk in Communities study; CARDIA = Coronary Artery Risk Development in Young Adults study; CHS = Cardiovascular Health Study;

FOC = Framingham Offspring cohort; HABC = Health ABC study; HCHS/SOL = Hispanic Community Health Study / Study of Latinos; JHS = Jackson Heart Study;

MESA = Multi-Ethnic Study of Atherosclerosis; SHS = Strong Heart Study

“Other” race category includes self-identified “other” race and individuals of mixed-race.

Lung function categories were defined as: PRISm-LLN = FEV<sub>1</sub>/FVC ≥ LLN, FEV<sub>1</sub> < LLN; Obstructive Spirometry-LLN = FEV<sub>1</sub>/FVC < LLN; Normal Spirometry-LLN = FEV<sub>1</sub>/FVC ≥ LLN, FEV<sub>1</sub> ≥ LLN. **Based on GLI equations for “Other” race.**

All P-value for comparison between PRISm and normal spirometry from Student's t-test or Wilcoxon rank sum test for continuous variables as appropriate and Chi-squared test for categorical variables were <.001.

<sup>a</sup> Values represent average over 10 imputed datasets

<sup>b</sup> Self-reported hypertension or systolic blood pressure ≥ 140 mmHg or diastolic blood pressure ≥ 90 mmHg or use of anti-hypertensive medications

<sup>c</sup> Self-reported diabetes or fasting blood sugar level ≥ 126 mg/dl or use of oral hypoglycemic agents or insulin

<sup>d</sup> Self-reported physician diagnosed chronic obstructive pulmonary disease, chronic bronchitis, or emphysema

<sup>e</sup> Self-reported physician diagnosed asthma

<sup>f</sup> Data on comorbidities at baseline, including coronary heart disease, congestive heart failure (HF), and stroke were self-reported. If missing, data was obtained from hospitalization records prior to baseline spirometry. In JHS, neither self-reported information on HF nor hospitalization records prior to baseline spirometry were available. Therefore, baseline HF was defined as HF events occurring within 5 years of baseline spirometry.

<sup>g</sup> For baseline eGFR, measurements obtained at baseline spirometry visit were used. If missing, first available eGFR measurements were used.

**eTable 10.** Associations Between Lung Function Category Defined Using GLI Equations for Lower Limit of Normal (LLN), All-Cause, Respiratory, and Coronary Heart Disease (CHD) Mortality, as Well as Respiratory-Related and CHD-Related Hospitalizations and Mortality

|                                         | At risk | Median Follow-Up in Years (IQR) | Events (Cumulative Incidence) | Incidence density rate /1,000 person-years | Lung Function Category (reference: Normal Spirometry-LLN) | HR [95% CI]       |
|-----------------------------------------|---------|---------------------------------|-------------------------------|--------------------------------------------|-----------------------------------------------------------|-------------------|
| All-cause mortality <sup>a</sup>        | 39,835  | 19.4 (12.1, 27.6)               | 15,661 (39.3)                 | 21                                         | PRISm-LLN                                                 | 1.59 [1.49, 1.70] |
|                                         |         |                                 |                               |                                            | Obstructive Spirometry-LLN                                | 1.44 [1.39, 1.50] |
| Respiratory Mortality <sup>b</sup>      | 31,998  | 19.6 (11.5, 27.8)               | 1,100 (3.4)                   | 2                                          | PRISm-LLN                                                 | 2.18 [1.63, 2.91] |
|                                         |         |                                 |                               |                                            | Obstructive Spirometry-LLN                                | 4.05 [3.56, 4.61] |
| CHD mortality <sup>a</sup>              | 39,628  | 19.6 (12.1, 27.6)               | 2,352 (5.9)                   | 3                                          | PRISm-LLN                                                 | 1.51 [1.29, 1.78] |
|                                         |         |                                 |                               |                                            | Obstructive Spirometry-LLN                                | 1.17 [1.05, 1.30] |
| Respiratory-related events <sup>c</sup> | 25,080  | 14.3 (8.9, 22.9)                | 4,101 (16.4)                  | 11                                         | PRISm-LLN                                                 | 2.36 [2.07, 2.70] |
|                                         |         |                                 |                               |                                            | Obstructive Spirometry-LLN                                | 3.40 [3.17, 3.63] |
| CHD-related events <sup>a</sup>         | 38,068  | 20.4 (12.3, 27.7)               | 5,552 (14.6)                  | 8                                          | PRISm-LLN                                                 | 1.29 [1.15, 1.44] |
|                                         |         |                                 |                               |                                            | Obstructive Spirometry-LLN                                | 1.09 [1.02, 1.17] |

Lung function categories were defined as: PRISm-LLN =  $FEV_1/FVC \geq LLN$ ,  $FEV_1 < LLN$ ; Obstructive Spirometry-LLN =  $FEV_1/FVC < LLN$ ; Normal Spirometry-LLN =  $FEV_1/FVC \geq LLN$ ,  $FEV_1 \geq LLN$ . **Based on GLI equations for “Other” race.**

Cox proportional hazards models were adjusted for age, gender, race/ethnicity, education, body mass index, smoking status, medical comorbidities such as, hypertension, diabetes, coronary heart disease, congestive heart failure, stroke, and estimated glomerular filtration rate; cohort was treated as a stratum variable.

<sup>a</sup> Cohorts included: Atherosclerosis Risk in Communities (ARIC), Coronary Artery Risk Development in Young Adults (CARDIA), Cardiovascular Health Study (CHS), Framingham Offspring Cohort (FOC), Health, Aging, and Body Composition (Health ABC), Jackson Heart Study (JHS), Multi-Ethnic Study of Atherosclerosis (MESA), and Strong Heart Study (SHS)

<sup>b</sup> Cohorts included: ARIC, CHS, CARDIA, Health ABC, MESA, SHS

<sup>c</sup> Cohorts included: ARIC, CHS, Health ABC, MESA



**eTable 11.** Associations Between Lung Function Category, All-Cause, Respiratory, and Coronary Heart Disease (CHD) Mortality, as Well as Respiratory-Related and CHD-Related Hospitalizations and Mortality, Additionally Adjusting for Baseline FEV<sub>1</sub>:FVC

|                                         | At risk | Median Follow-Up in Years (IQR) | Events (Cumulative Incidence) | Incidence density rate /1,000 person-years | Lung Function Category (reference: Normal Spirometry) | HR [95% CI]       |
|-----------------------------------------|---------|---------------------------------|-------------------------------|--------------------------------------------|-------------------------------------------------------|-------------------|
| All-cause mortality <sup>a</sup>        | 39,835  | 19.4 (12.1, 27.6)               | 15,661 (39.3)                 | 21                                         | PRISm                                                 | 1.47 [1.39, 1.55] |
|                                         |         |                                 |                               |                                            | Obstructive Spirometry                                | 1.10 [1.04, 1.16] |
| Respiratory mortality <sup>b</sup>      | 31,998  | 19.6 (11.5, 27.8)               | 1,100 (3.4)                   | 2                                          | PRISm                                                 | 1.79 [1.41, 2.27] |
|                                         |         |                                 |                               |                                            | Obstructive Spirometry                                | 0.99 [0.83, 1.19] |
| CHD mortality <sup>a</sup>              | 39,628  | 19.6 (12.1, 27.6)               | 2,352 (5.9)                   | 3                                          | PRISm                                                 | 1.54 [1.35, 1.76] |
|                                         |         |                                 |                               |                                            | Obstructive Spirometry                                | 1.11 [0.97, 1.27] |
| Respiratory-related events <sup>c</sup> | 25,080  | 14.3 (8.9, 22.9)                | 4,101 (16.4)                  | 11                                         | PRISm                                                 | 1.82 [1.62, 2.04] |
|                                         |         |                                 |                               |                                            | Obstructive Spirometry                                | 1.49 [1.36, 1.64] |
| CHD-related events <sup>a</sup>         | 38,068  | 20.4 (12.3, 27.7)               | 5,552 (14.6)                  | 8                                          | PRISm                                                 | 1.29 [1.18, 1.42] |
|                                         |         |                                 |                               |                                            | Obstructive Spirometry                                | 1.13 [1.03, 1.24] |

Lung function categories were defined as: PRISm = FEV<sub>1</sub>/FVC≥0.7, FEV<sub>1</sub><80%; Obstructive Spirometry = FEV<sub>1</sub>/FVC<0.7; Normal Spirometry= FEV<sub>1</sub>/FVC≥0.7, FEV<sub>1</sub>≥80%.

Cox proportional hazards models were adjusted for age, gender, race/ethnicity, education, body mass index, smoking status, medical comorbidities such as, hypertension, diabetes, coronary heart disease, congestive heart failure, stroke, estimated glomerular filtration rate, and baseline FEV<sub>1</sub>/FVC; cohort was treated as a stratum variable.

<sup>a</sup> Cohorts included: Atherosclerosis Risk in Communities (ARIC), Coronary Artery Risk Development in Young Adults (CARDIA), Cardiovascular Health Study (CHS), Framingham Offspring Cohort (FOC), Health, Aging, and Body Composition (Health ABC), Jackson Heart Study (JHS), Multi-Ethnic Study of Atherosclerosis (MESA), and Strong Heart Study (SHS)

<sup>b</sup> Cohorts included: ARIC, CHS, CARDIA, Health ABC, MESA, SHS

<sup>c</sup> Cohorts included: ARIC, CHS, Health ABC, MESA

**eTable 12.** Associations Between Lung Function Category, Mortality, CHD Events, and Respiratory-Related Events, Complete Case Analysis

|                                         | At risk | Median Follow-Up in Years (IQR) | Events (Cumulative Incidence) | Incidence density rate /1,000 person-years | Lung Function Category (reference: Normal Spirometry) | HR [95% CI]       |
|-----------------------------------------|---------|---------------------------------|-------------------------------|--------------------------------------------|-------------------------------------------------------|-------------------|
| All-cause mortality <sup>a</sup>        | 26,994  | 17.5 (11.9, 28.0)               | 8,105 (30.0)                  | 16                                         | PRISm                                                 | 1.47 [1.36, 1.59] |
|                                         |         |                                 |                               |                                            | Obstructive Spirometry                                | 1.32 [1.25, 1.39] |
| Respiratory mortality <sup>b</sup>      | 20,871  | 17.6 (11.2, 28.4)               | 616 (3.0)                     | 2                                          | PRISm                                                 | 1.83 [1.35, 2.50] |
|                                         |         |                                 |                               |                                            | Obstructive Spirometry                                | 2.73 [2.28, 3.27] |
| CHD mortality <sup>a</sup>              | 26,790  | 17.7 (11.9, 28.0)               | 1,521 (5.7)                   | 3                                          | PRISm                                                 | 1.35 [1.13, 1.61] |
|                                         |         |                                 |                               |                                            | Obstructive Spirometry                                | 1.16 [1.04, 1.31] |
| Respiratory-related events <sup>c</sup> | 15,424  | 12.8 (8.4, 21.9)                | 1,986 (12.9)                  | 9                                          | PRISm                                                 | 1.78 [1.50, 2.12] |
|                                         |         |                                 |                               |                                            | Obstructive Spirometry                                | 3.04 [2.75, 3.36] |
| CHD-related events <sup>a</sup>         | 25,504  | 18.8 (12.1, 28.2)               | 3,258 (12.8)                  | 7                                          | PRISm                                                 | 1.13 [0.99, 1.28] |
|                                         |         |                                 |                               |                                            | Obstructive Spirometry                                | 1.06 [0.98, 1.16] |

Lung function categories were defined as: PRISm = FEV1/FVC $\geq$ 0.7, FEV1 $<$ 80%; Obstructive Spirometry = FEV1/FVC $<$ 0.7; Normal Spirometry= FEV1/FVC $\geq$ 0.7, FEV1 $\geq$ 80%.

Cox proportional hazards models were adjusted for age, gender, race/ethnicity, education, body mass index, smoking status, medical comorbidities such as, hypertension, diabetes, coronary heart disease, congestive heart failure, stroke, and estimated glomerular filtration rate; cohort was treated as a stratum variable.

<sup>a</sup> Cohorts included: Atherosclerosis Risk in Communities (ARIC), Coronary Artery Risk Development in Young Adults (CARDIA), Cardiovascular Health Study (CHS), Framingham Offspring Cohort (FOC), Health, Aging, and Body Composition (Health ABC), Jackson Heart Study (JHS), Multi-Ethnic Study of Atherosclerosis (MESA), and Strong Heart Study (SHS)

<sup>b</sup> Cohorts included: ARIC, CHS, CARDIA, Health ABC, MESA, SHS

<sup>c</sup> Cohorts included: ARIC, CHS, Health ABC, MESA

**eFigure 1. CONSORT**

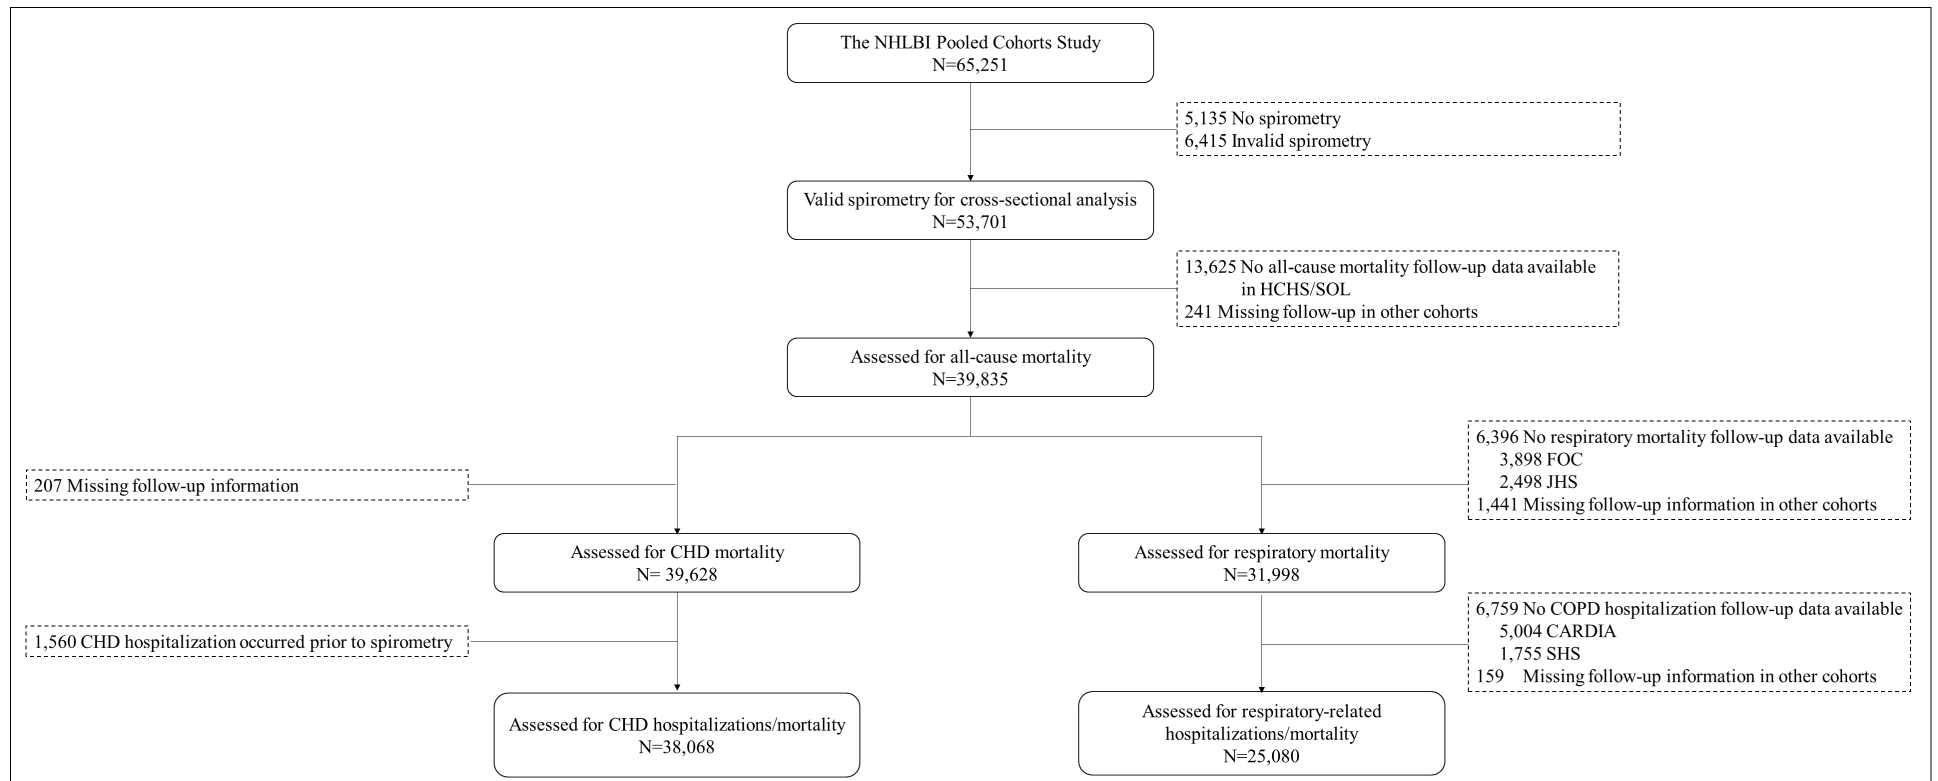

Atherosclerosis Risk in Communities (ARIC), Coronary Artery Risk Development in Young Adults (CARDIA), Cardiovascular Health Study (CHS), Framingham Offspring Cohort (FOC), Health, Aging, and Body Composition (Health ABC), Hispanic Community health Study/Study of Latinos (HCHS/SOL) Jackson Heart Study (JHS), Multi-Ethnic Study of Atherosclerosis (MESA), and Strong Heart Study (SHS)

**eFigure 2.** Residual Plot for Checking the Proportional Hazards Assumption for PRISm and Mortality, CHD Events, and Respiratory-Related Events

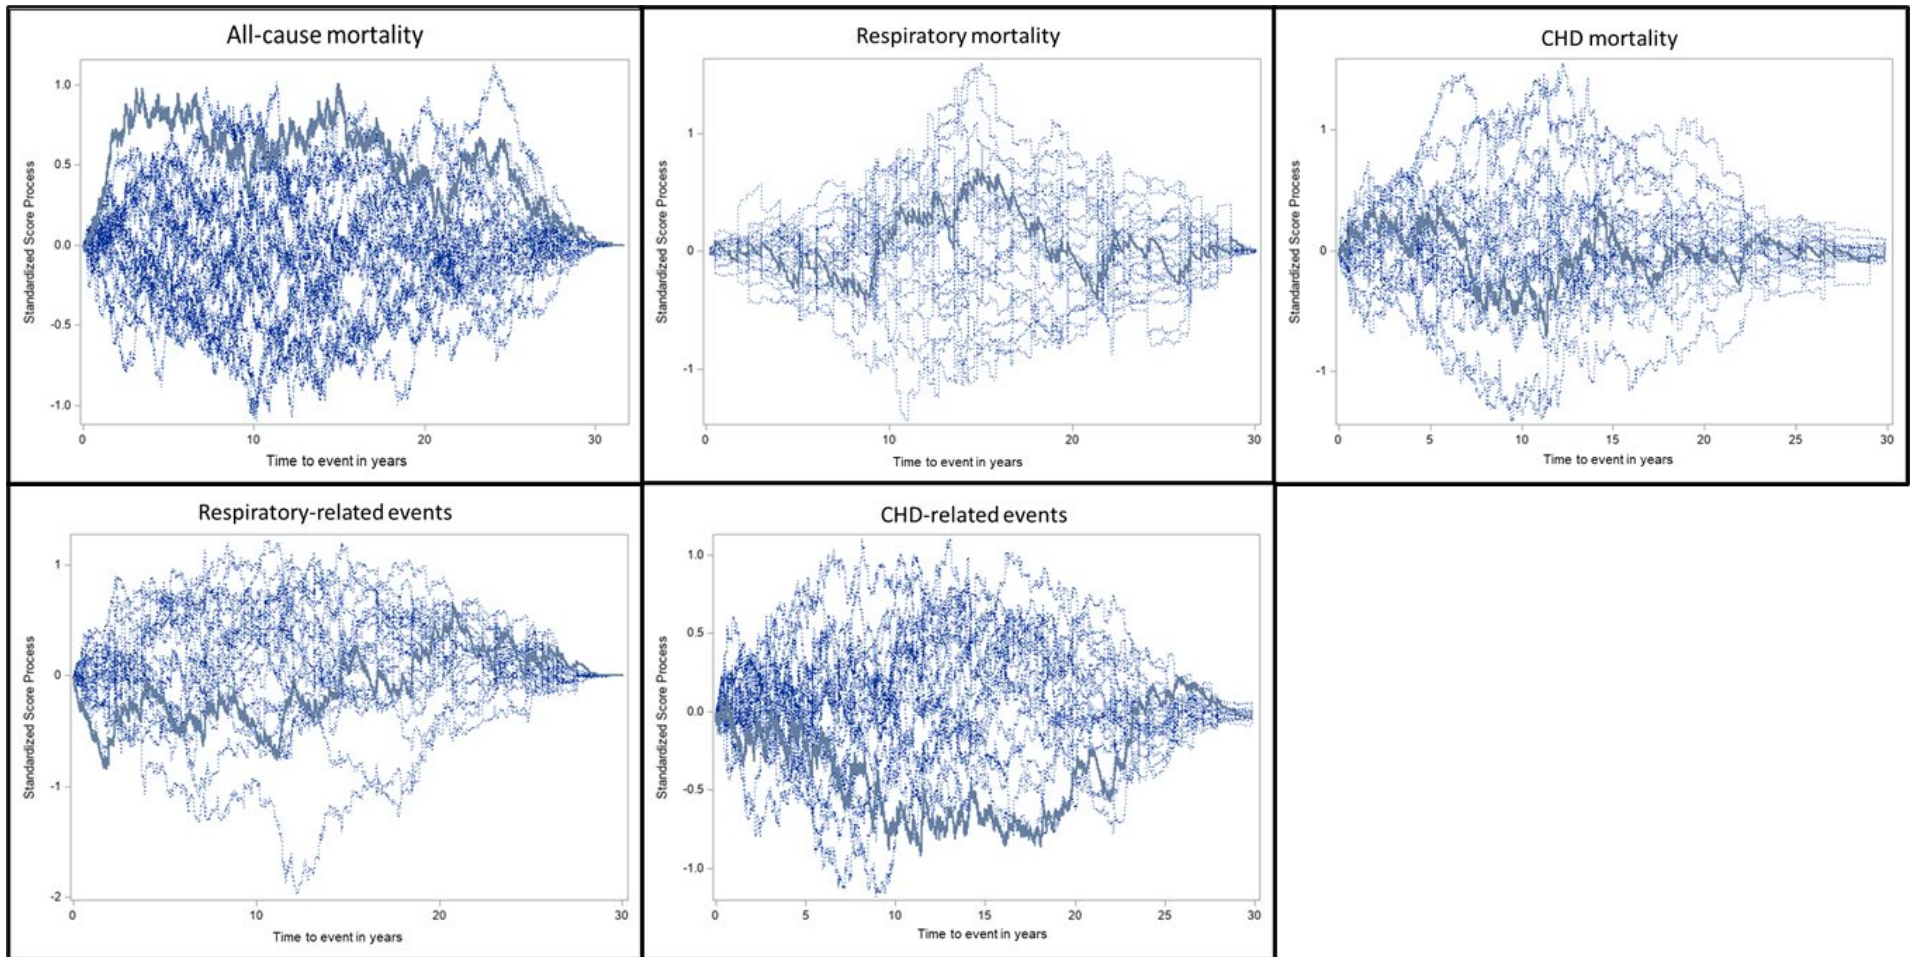

**eFigure 3.** Unadjusted Cumulative Incidence of All-Cause Mortality by Lung Function Category

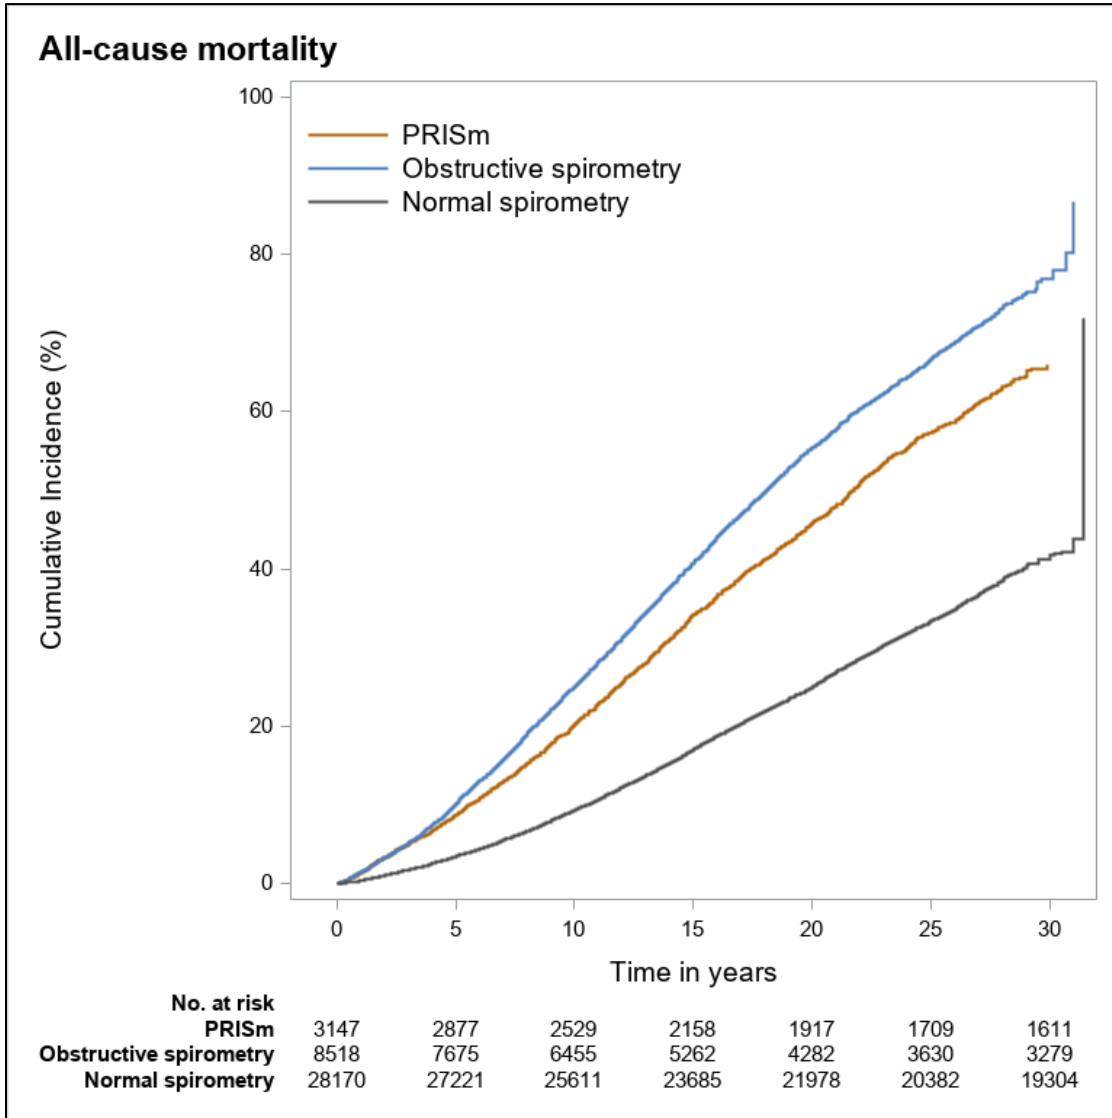

**eFigure 4.** Unadjusted Cumulative Incidence of Respiratory- and Coronary Heart Disease (CHD) Mortality, and Respiratory-Related and CHD-Related Hospitalizations and Mortality by Lung Function Category

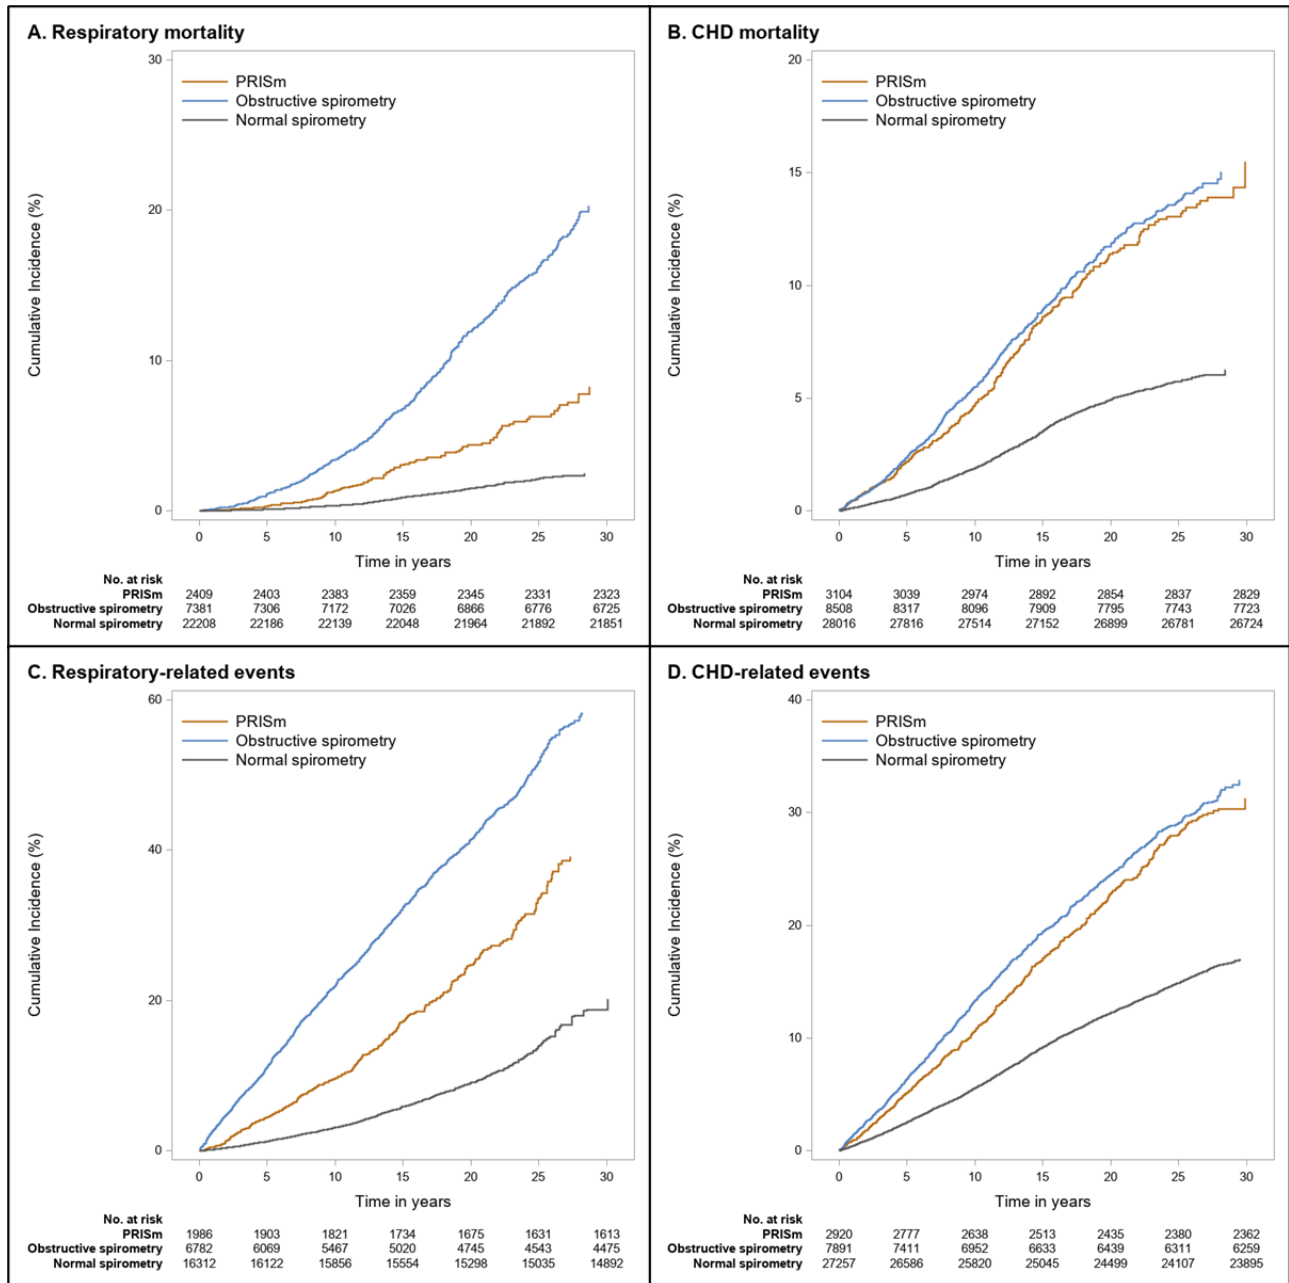

**eFigure 5.** Effects of Omitting Covariates From the Fully Adjusted Model for All-Cause Mortality on the Hazard Ratio for PRISm vs Normal Spirometry

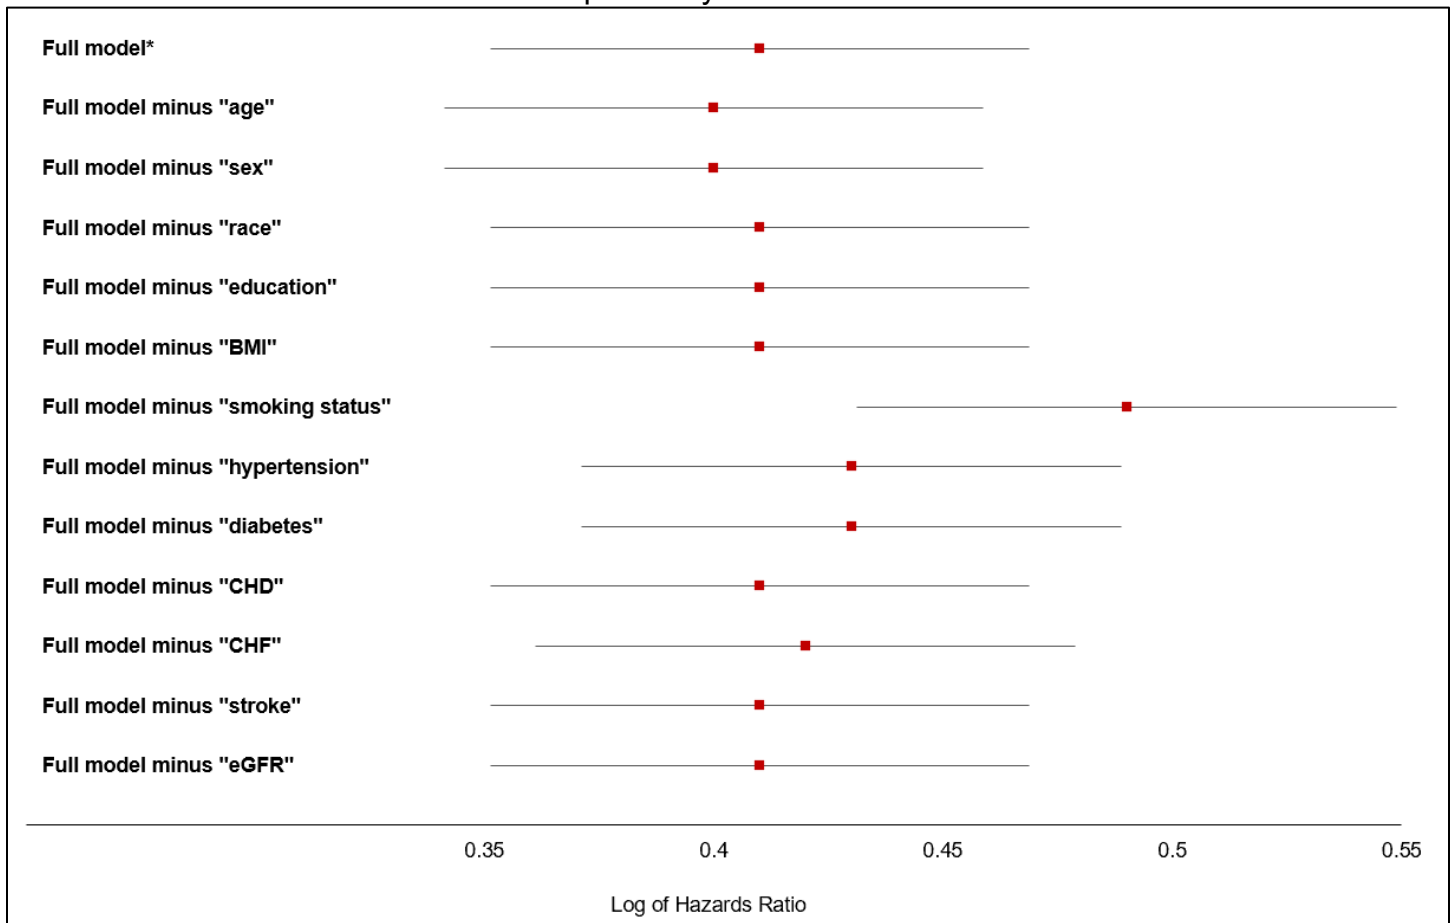

Lung function categories were defined as: PRISm =  $FEV_1/FVC \geq 0.7$ ,  $FEV_1 < 80\%$ ; Obstructive spirometry =  $FEV_1/FVC < 0.7$ ; Normal spirometry =  $FEV_1/FVC \geq 0.7$ ,  $FEV_1 \geq 80\%$ .

\* Cox proportional hazards full model was adjusted for age, gender, race/ethnicity, education, body mass index, smoking status, medical comorbidities such as, hypertension, diabetes, coronary heart disease (CHD), congestive heart failure (CHF), stroke, and estimated glomerular filtration rate (eGFR); cohort was treated as a stratum variable.

Cohorts included: Atherosclerosis Risk in Communities (ARIC), Coronary Artery Risk Development in Young Adults (CARDIA), Cardiovascular Health Study (CHS), Framingham Offspring Cohort (FOC), Health, Aging, and Body Composition (Health ABC), Jackson Heart Study (JHS), Multi-Ethnic Study of Atherosclerosis (MESA), and Strong Heart Study (SHS)

**eFigure 6.** Forest Plot of Stratified Subgroup Analyses (PRISm vs Normal Spirometry) for All-Cause Mortality

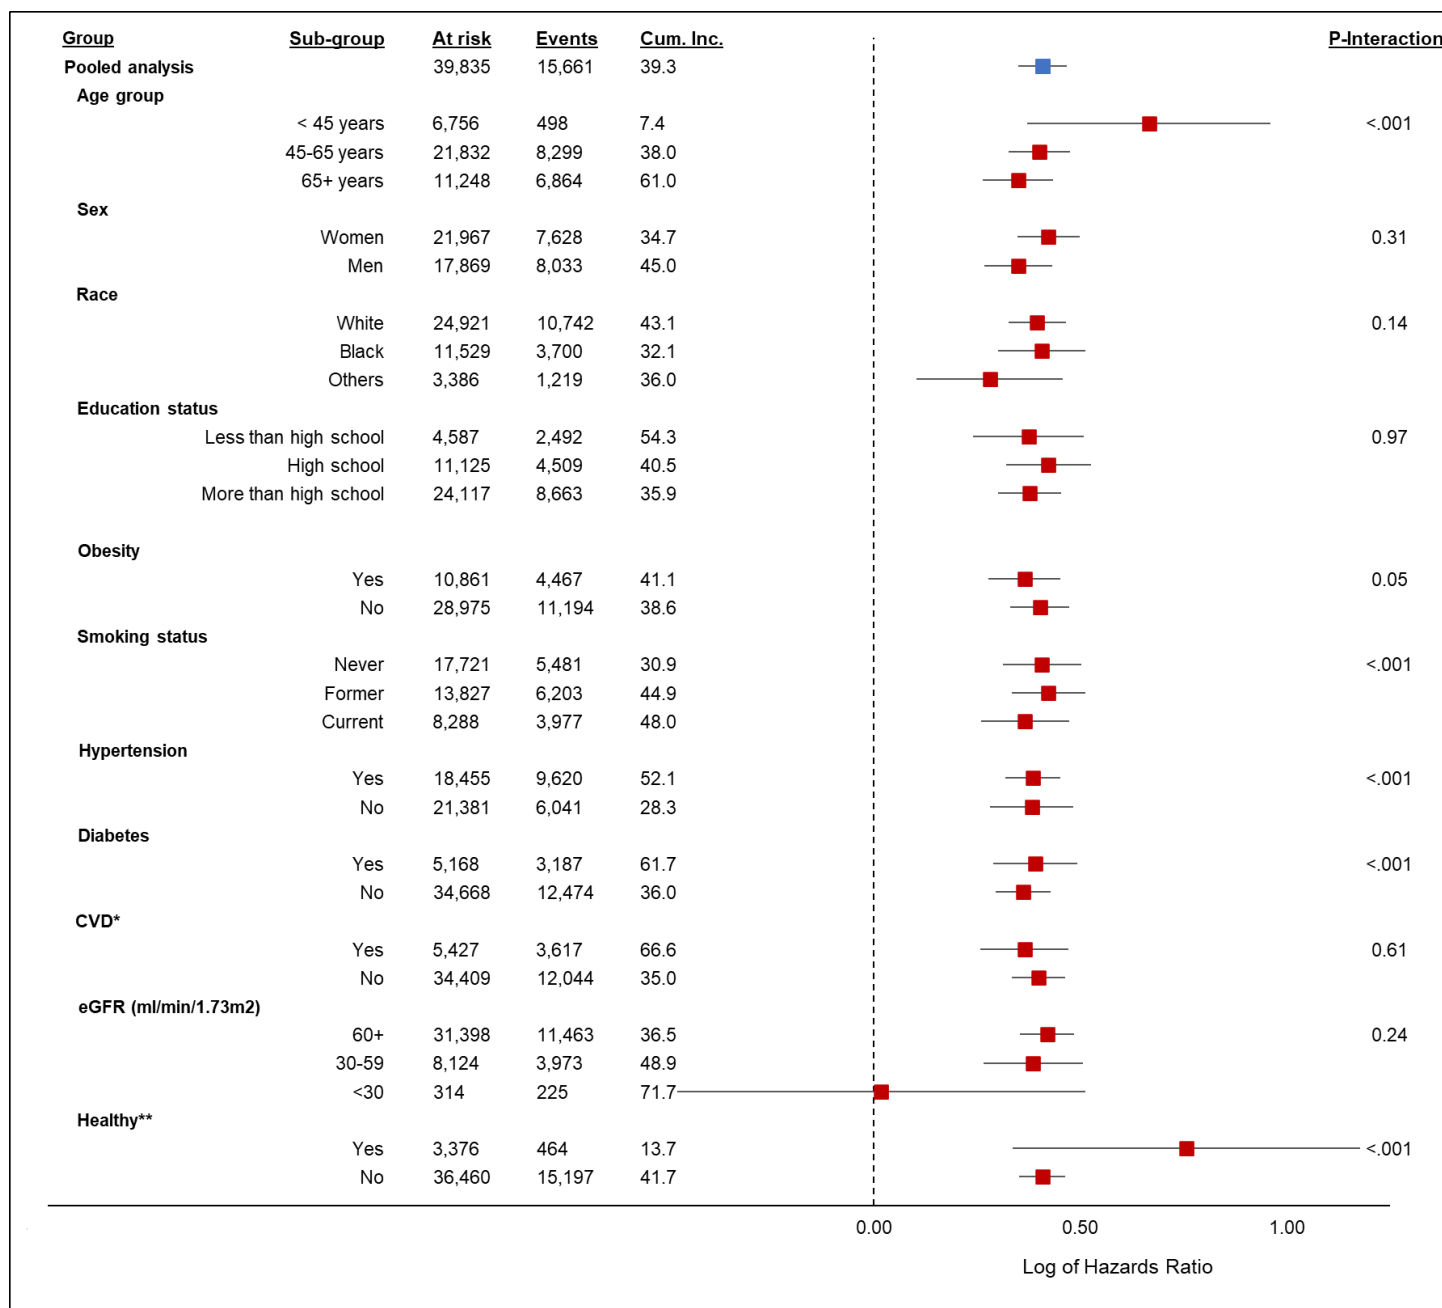

Lung function categories were defined as: PRISm =  $FEV_1/FVC \geq 0.7$ ,  $FEV_1 < 80\%$ ; Obstructive spirometry =  $FEV_1/FVC < 0.7$ ; Normal spirometry =  $FEV_1/FVC \geq 0.7$ ,  $FEV_1 \geq 80\%$ .

Cox proportional hazards models were adjusted for age, gender, race/ethnicity, education, body mass index, smoking status, medical comorbidities such as, hypertension, diabetes, coronary heart disease, congestive heart failure, stroke, and estimated glomerular filtration rate; cohort was treated as a stratum variable.

Cohorts included: Atherosclerosis Risk in Communities (ARIC), Coronary Artery Risk Development in Young Adults (CARDIA), Cardiovascular Health Study (CHS), Framingham Offspring Cohort (FOC), Health, Aging, and Body Composition (Health ABC), Jackson Heart Study (JHS), Multi-Ethnic Study of Atherosclerosis (MESA), and Strong Heart Study (SHS)

\*Cardio-vascular disease, which includes coronary heart disease, congestive heart failure, and stroke

\*\*Healthy individuals are defined as non-smoking individuals with normal BMI and estimated glomerular filtration rate, and no medical comorbidities such as, hypertension, diabetes, coronary heart disease, congestive heart failure, and stroke.



**eFigure 7.** Forest Plot of Stratified Subgroup Analyses (PRISm vs Normal Spirometry) for Respiratory Mortality

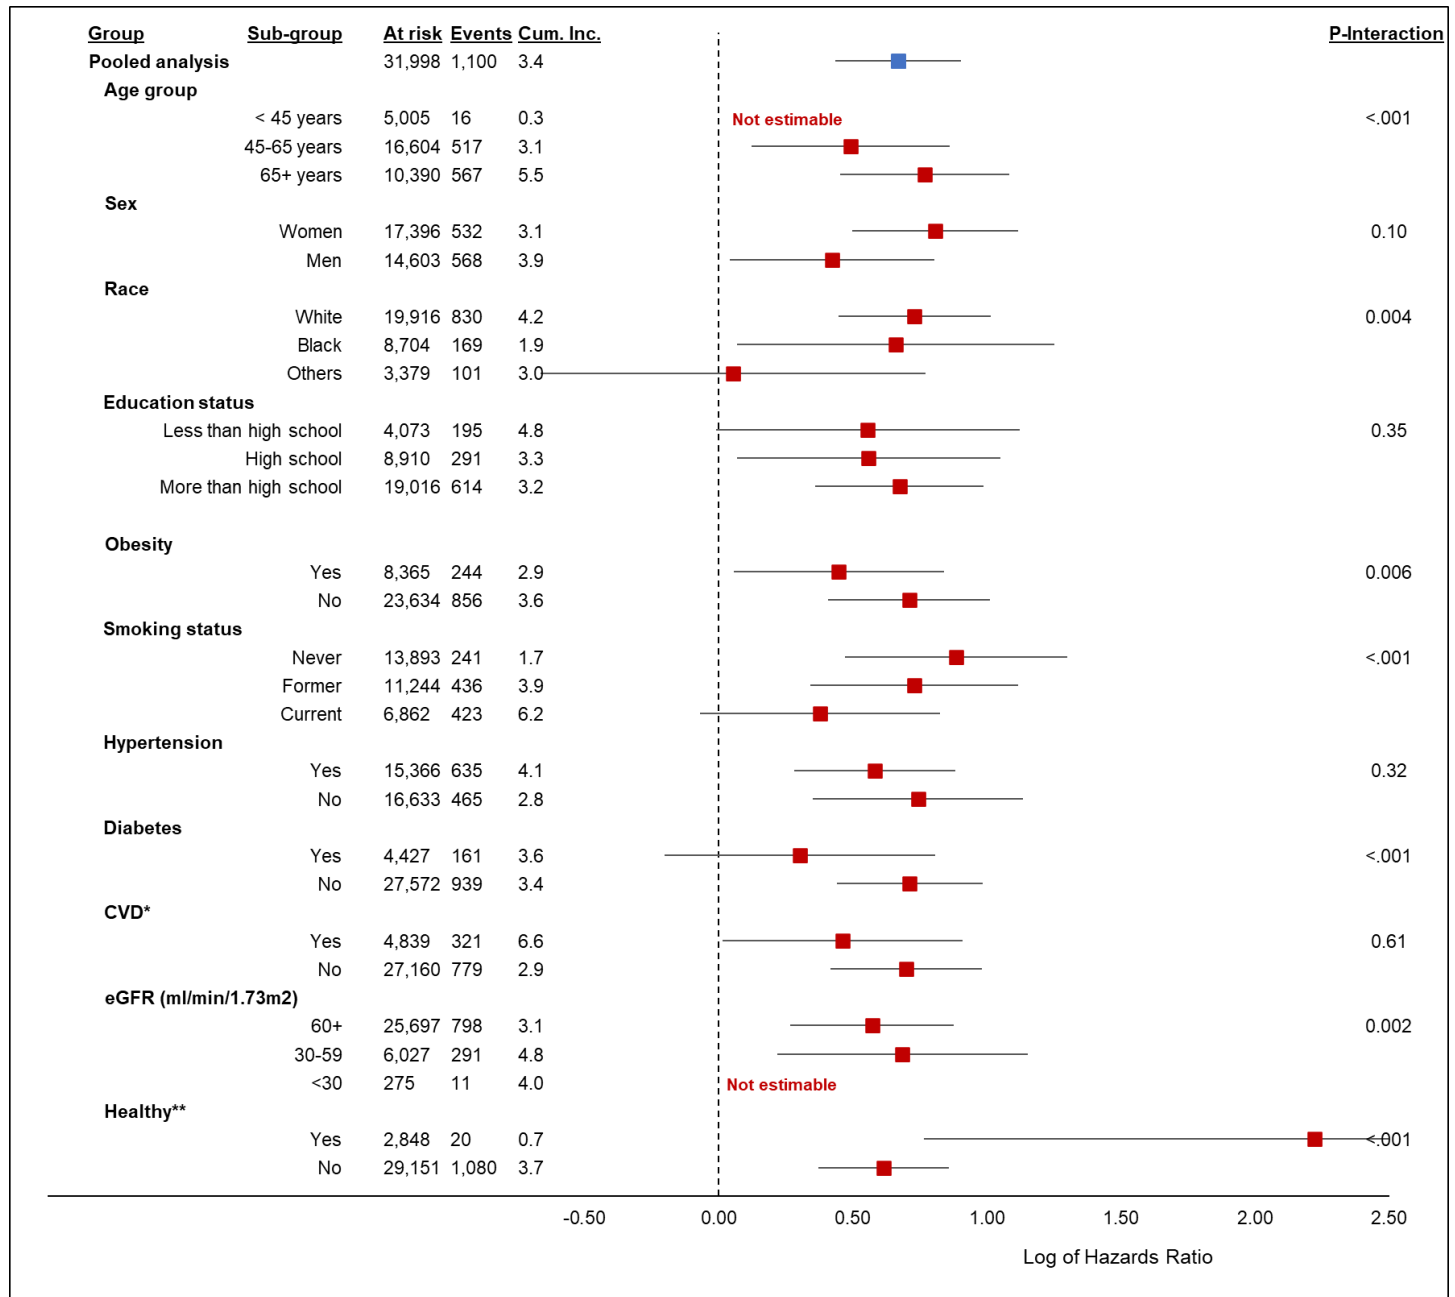

Lung function categories were defined as: PRISm = FEV<sub>1</sub>/FVC ≥ 0.7, FEV<sub>1</sub> < 80%; Obstructive spirometry = FEV<sub>1</sub>/FVC < 0.7; Normal spirometry = FEV<sub>1</sub>/FVC ≥ 0.7, FEV<sub>1</sub> ≥ 80%.

Cox proportional hazards models were adjusted for age, gender, race/ethnicity, education, body mass index, smoking status, medical comorbidities such as, hypertension, diabetes, coronary heart disease, congestive heart failure, stroke, and estimated glomerular filtration rate; cohort was treated as a stratum variable.

Cohorts included: Atherosclerosis Risk in Communities (ARIC), Coronary Artery Risk Development in Young Adults (CARDIA), Cardiovascular Health Study (CHS), Health, Aging, and Body Composition (Health ABC), Multi-Ethnic Study of Atherosclerosis (MESA), and Strong Heart Study (SHS)

“Other” race category includes Hispanic, East Asian, and individuals of mixed race.

\*Cardio-vascular disease, which includes coronary heart disease, congestive heart failure, and stroke

\*\*Healthy individuals are defined as non-smoking individuals with normal BMI and estimated glomerular filtration rate, and no medical comorbidities such as, hypertension, diabetes, coronary heart disease, congestive heart failure, and stroke.

**eFigure 8.** Forest Plot of Stratified Subgroup Analyses (PRISm vs Normal Spirometry) for CHD Mortality Events

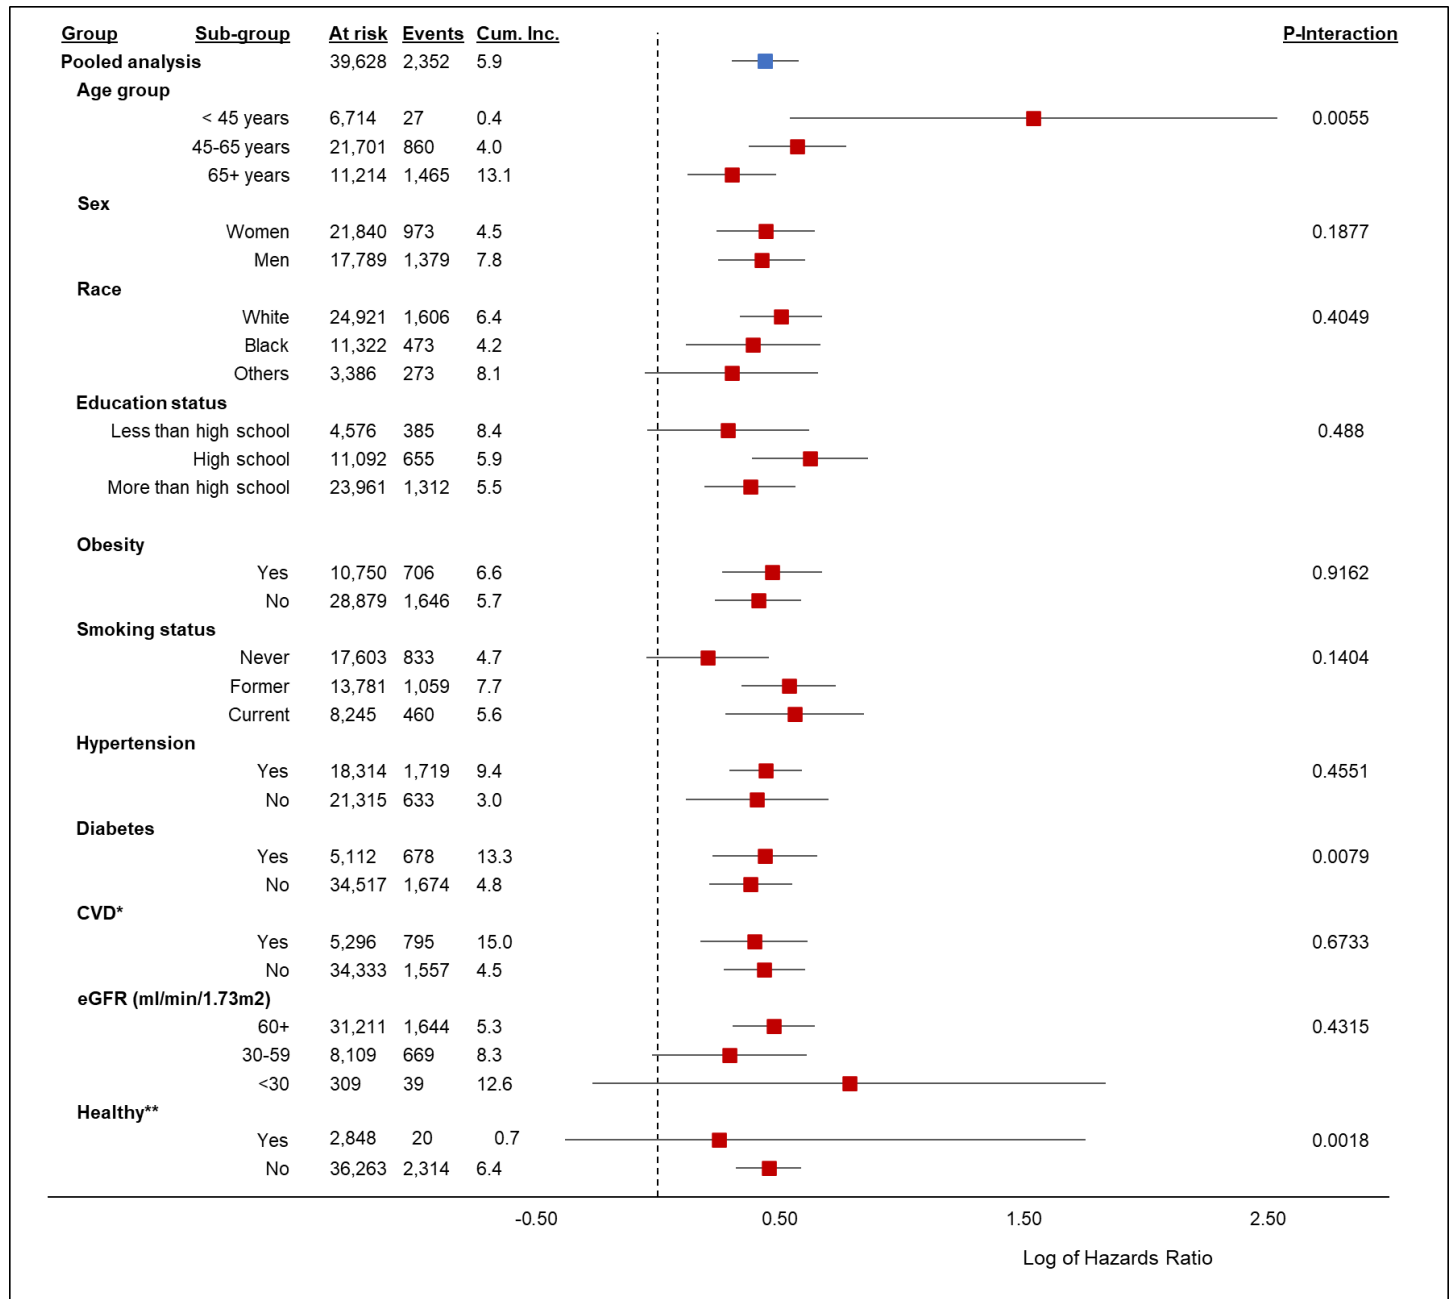

Lung function categories were defined as: PRISm = FEV<sub>1</sub>/FVC ≥ 0.7, FEV<sub>1</sub> < 80%; Obstructive spirometry = FEV<sub>1</sub>/FVC < 0.7; Normal spirometry = FEV<sub>1</sub>/FVC ≥ 0.7, FEV<sub>1</sub> ≥ 80%.

Cox proportional hazards models were adjusted for age, gender, race/ethnicity, education, body mass index, smoking status, medical comorbidities such as, hypertension, diabetes, coronary heart disease, congestive heart failure, stroke, and estimated glomerular filtration rate; cohort was treated as a stratum variable.

Cohorts included: Atherosclerosis Risk in Communities (ARIC), Coronary Artery Risk Development in Young Adults (CARDIA), Cardiovascular Health Study (CHS), Framingham Offspring Cohort (FOC), Health, Aging, and Body Composition (Health ABC), Jackson Heart Study (JHS), Multi-Ethnic Study of Atherosclerosis (MESA), and Strong Heart Study (SHS)

“Other” race category includes Hispanic, East Asian, and individuals of mixed race.

\*Cardio-vascular disease, which includes coronary heart disease, congestive heart failure, and stroke

\*\*Healthy individuals are defined as non-smoking individuals with normal BMI and estimated glomerular filtration rate, and no medical comorbidities such as, hypertension, diabetes, coronary heart disease, congestive heart failure, and stroke.

**eFigure 9.** Forest Plot of Stratified Subgroup Analyses (PRISm vs Normal Spirometry) for Respiratory-Related Events

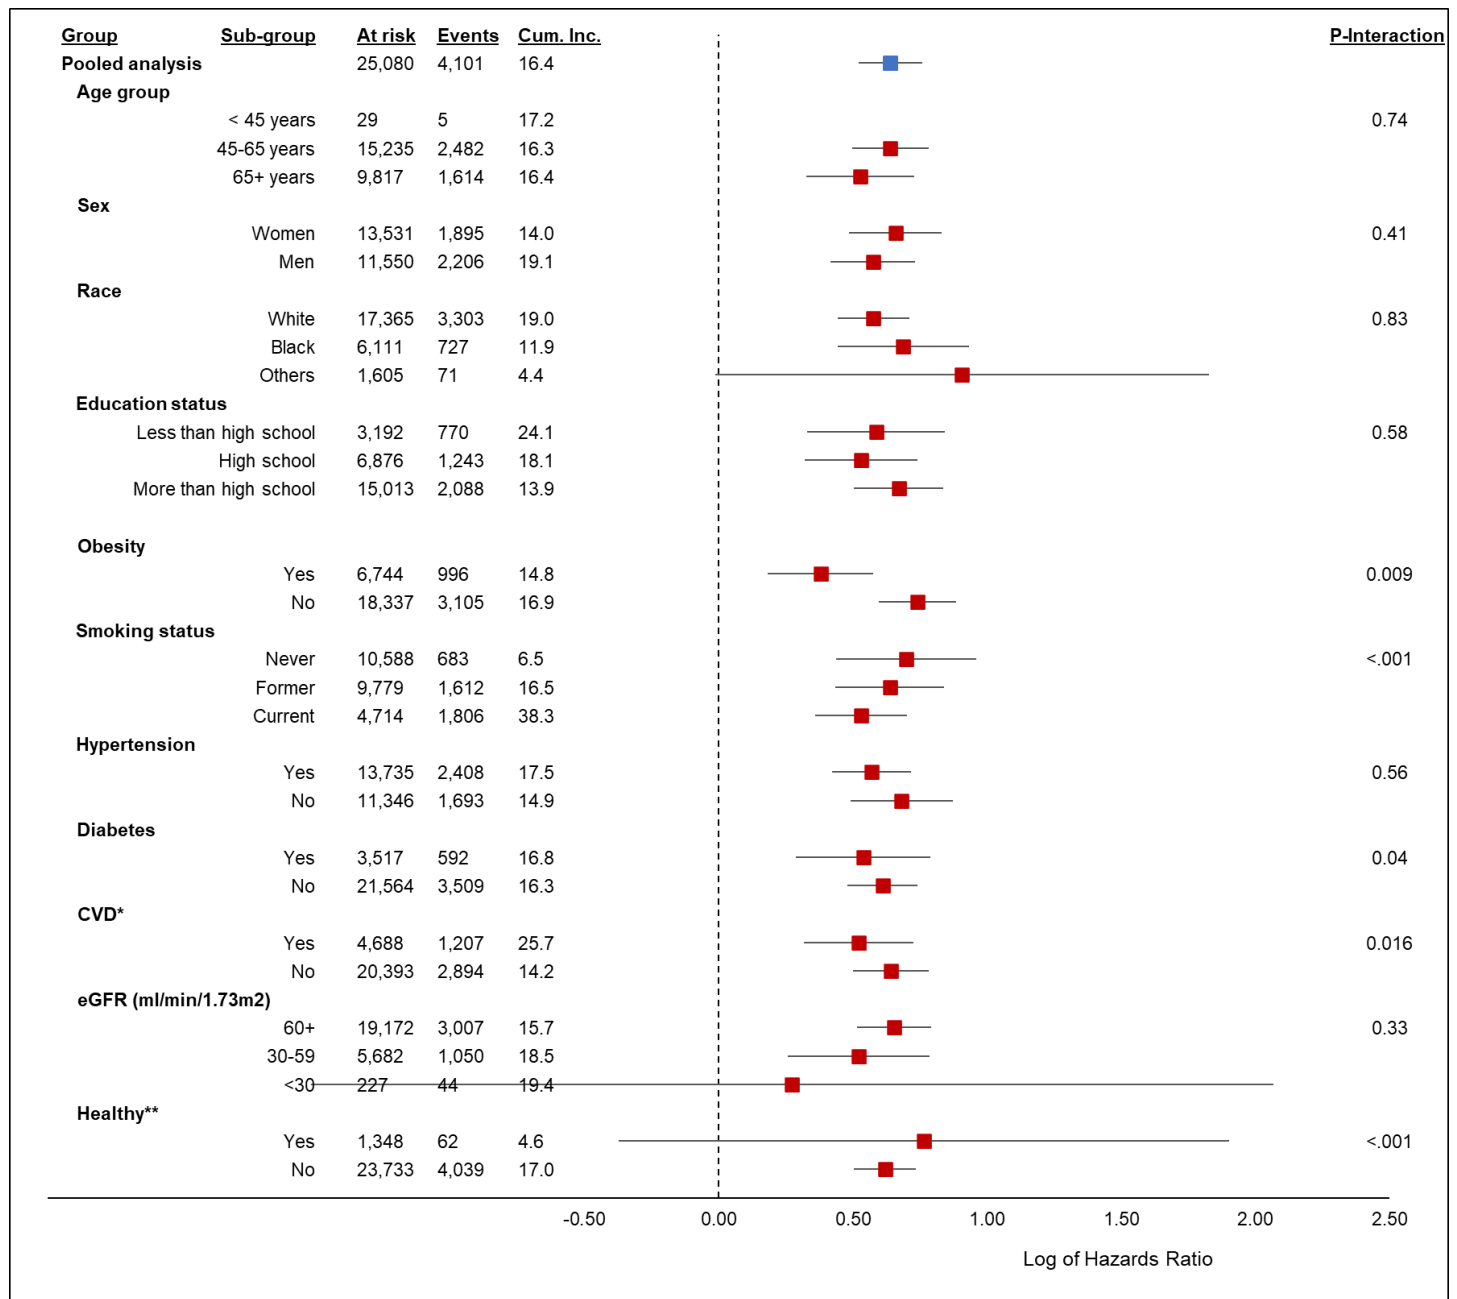

Lung function categories were defined as: PRISm = FEV<sub>1</sub>/FVC ≥ 0.7, FEV<sub>1</sub> < 80%; Obstructive spirometry = FEV<sub>1</sub>/FVC < 0.7; Normal spirometry = FEV<sub>1</sub>/FVC ≥ 0.7, FEV<sub>1</sub> ≥ 80%.

Cox proportional hazards models were adjusted for age, gender, race/ethnicity, education, body mass index, smoking status, medical comorbidities such as, hypertension, diabetes, coronary heart disease, congestive heart failure, stroke, and estimated glomerular filtration rate; cohort was treated as a stratum variable.

Cohorts included: Atherosclerosis Risk in Communities (ARIC), Cardiovascular Health Study (CHS), Health, Aging, and Body Composition (Health ABC), and Multi-Ethnic Study of Atherosclerosis (MESA)

“Other” race category includes Hispanic, East Asian, and individuals of mixed race.

\*Cardio-vascular disease, which includes coronary heart disease, congestive heart failure, and stroke

\*\*Healthy individuals are defined as non-smoking individuals with normal BMI and estimated glomerular filtration rate, and no medical comorbidities such as, hypertension, diabetes, coronary heart disease, congestive heart failure, and stroke.

**eFigure 10.** Forest Plot of Stratified Subgroup Analyses (PRISm vs Normal Spirometry) for CHD-Related Events

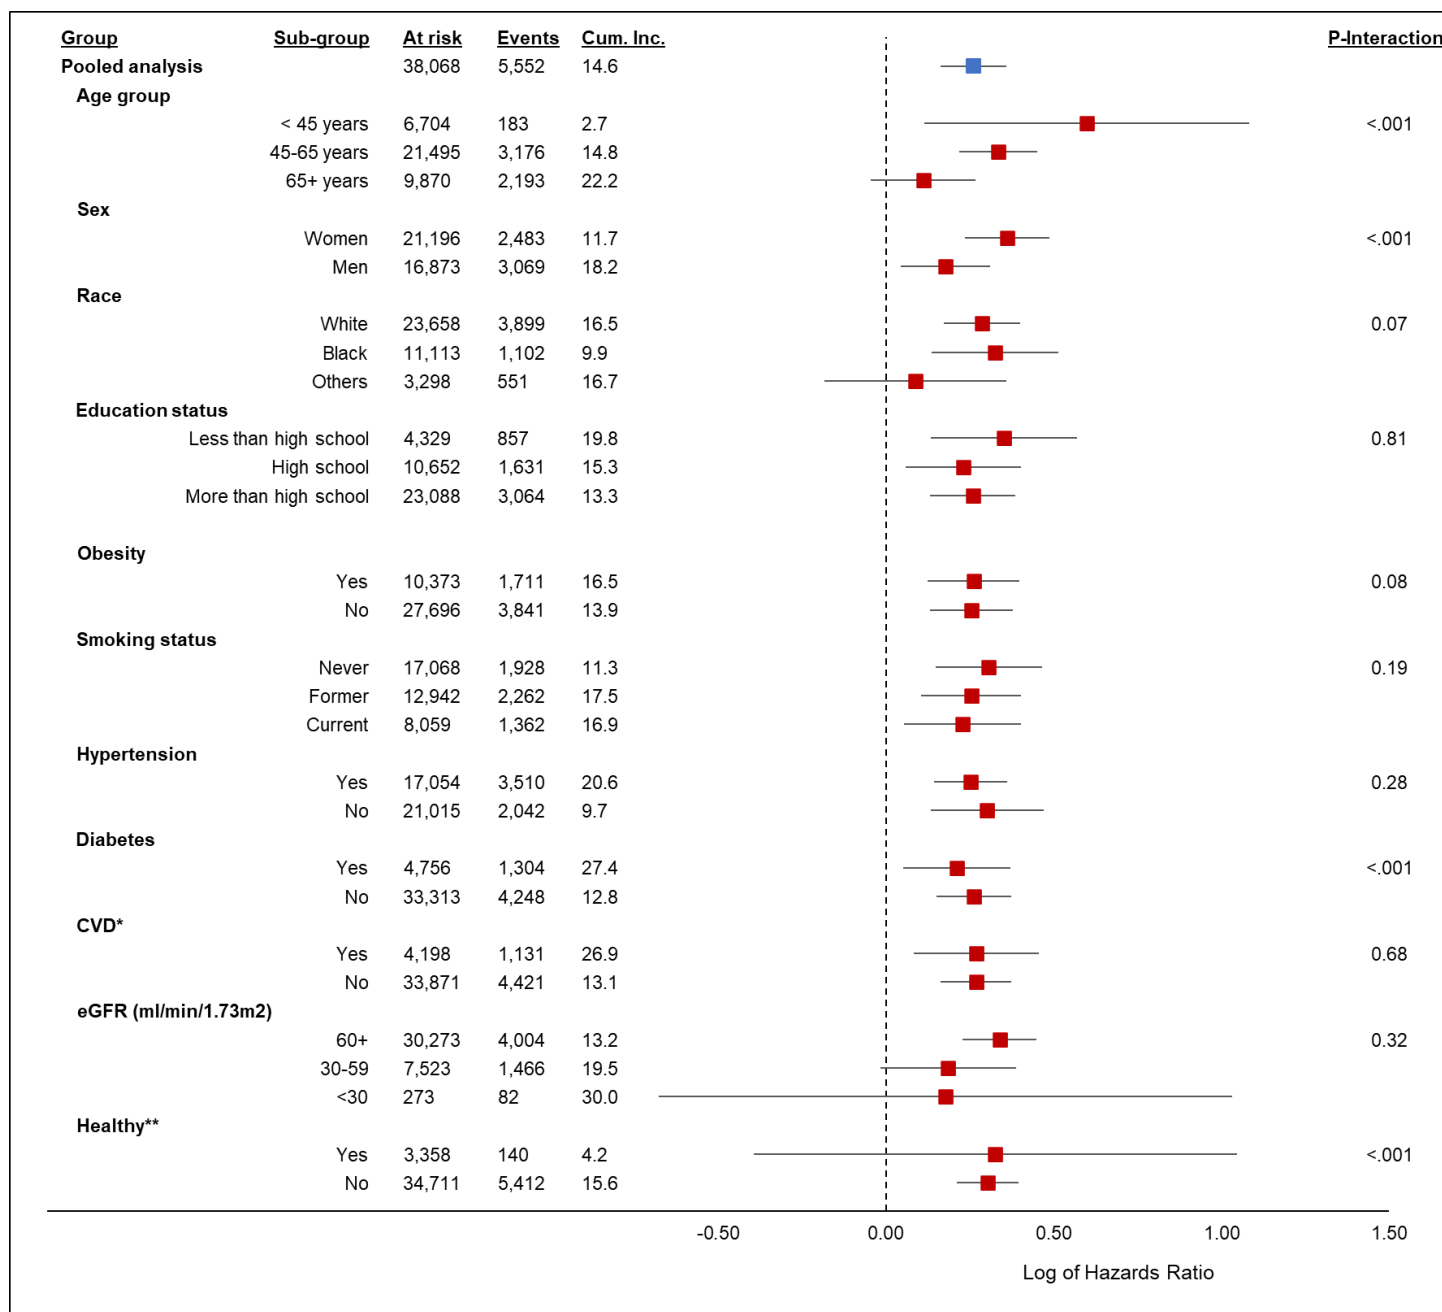

Lung function categories were defined as: PRISm = FEV<sub>1</sub>/FVC ≥ 0.7, FEV<sub>1</sub> < 80%; Obstructive spirometry = FEV<sub>1</sub>/FVC < 0.7; Normal spirometry = FEV<sub>1</sub>/FVC ≥ 0.7, FEV<sub>1</sub> ≥ 80%.

Cox proportional hazards models were adjusted for age, gender, race/ethnicity, education, body mass index, smoking status, medical comorbidities such as, hypertension, diabetes, coronary heart disease, congestive heart failure, stroke, and estimated glomerular filtration rate; cohort was treated as a stratum variable.

Cohorts included: Atherosclerosis Risk in Communities (ARIC), Coronary Artery Risk Development in Young Adults (CARDIA), Cardiovascular Health Study (CHS), Framingham Offspring Cohort (FOC), Health, Aging, and Body Composition (Health ABC), Jackson Heart Study (JHS), Multi-Ethnic Study of Atherosclerosis (MESA), and Strong Heart Study (SHS)

“Other” race category includes Hispanic, East Asian, and individuals of mixed race.

\*Cardio-vascular disease, which includes coronary heart disease, congestive heart failure, and stroke

\*\*Healthy individuals are defined as non-smoking individuals with normal BMI and estimated glomerular filtration rate, and no medical comorbidities such as, hypertension, diabetes, coronary heart disease, congestive heart failure, and stroke.

**eFigure 11.** Forest Plot of Cohort-Stratified Analyses (PRISm vs Normal Spirometry) for All-Cause Mortality

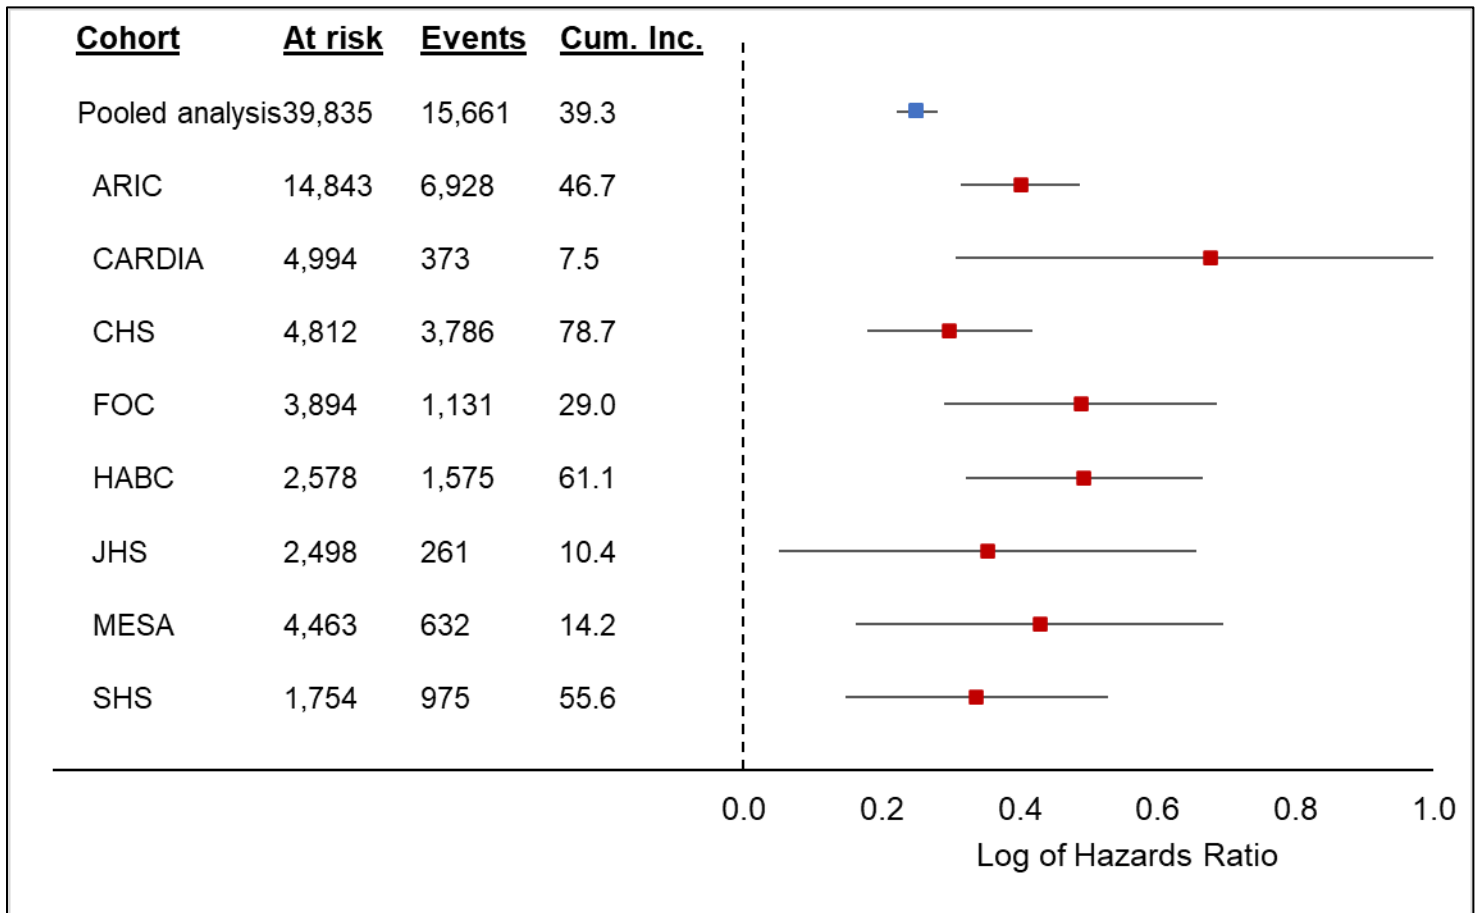

Lung function categories were defined as: PRISm =  $FEV_1/FVC \geq 0.7$ ,  $FEV_1 < 80\%$ ; Obstructive spirometry =  $FEV_1/FVC < 0.7$ ; Normal spirometry =  $FEV_1/FVC \geq 0.7$ ,  $FEV_1 \geq 80\%$ .

ARIC = Atherosclerosis Risk in Communities study; CARDIA = Coronary Artery Risk Development in Young Adults study; CHS = Cardiovascular Health Study; FOC = Framingham Offspring Cohort; HABC = Health ABC study; JHS = Jackson Heart Study; MESA = Multi-Ethnic Study of Atherosclerosis; SHS = Strong Heart Study

Cox proportional hazards models were adjusted for age, gender, race/ethnicity, education, body mass index, smoking status, medical comorbidities such as, hypertension, diabetes, coronary heart disease, congestive heart failure, stroke, and estimated glomerular filtration rate.

**eFigure 12.** Forest Plot of Cohort-Stratified Analyses (PRISm vs Normal Spirometry) for Respiratory Mortality

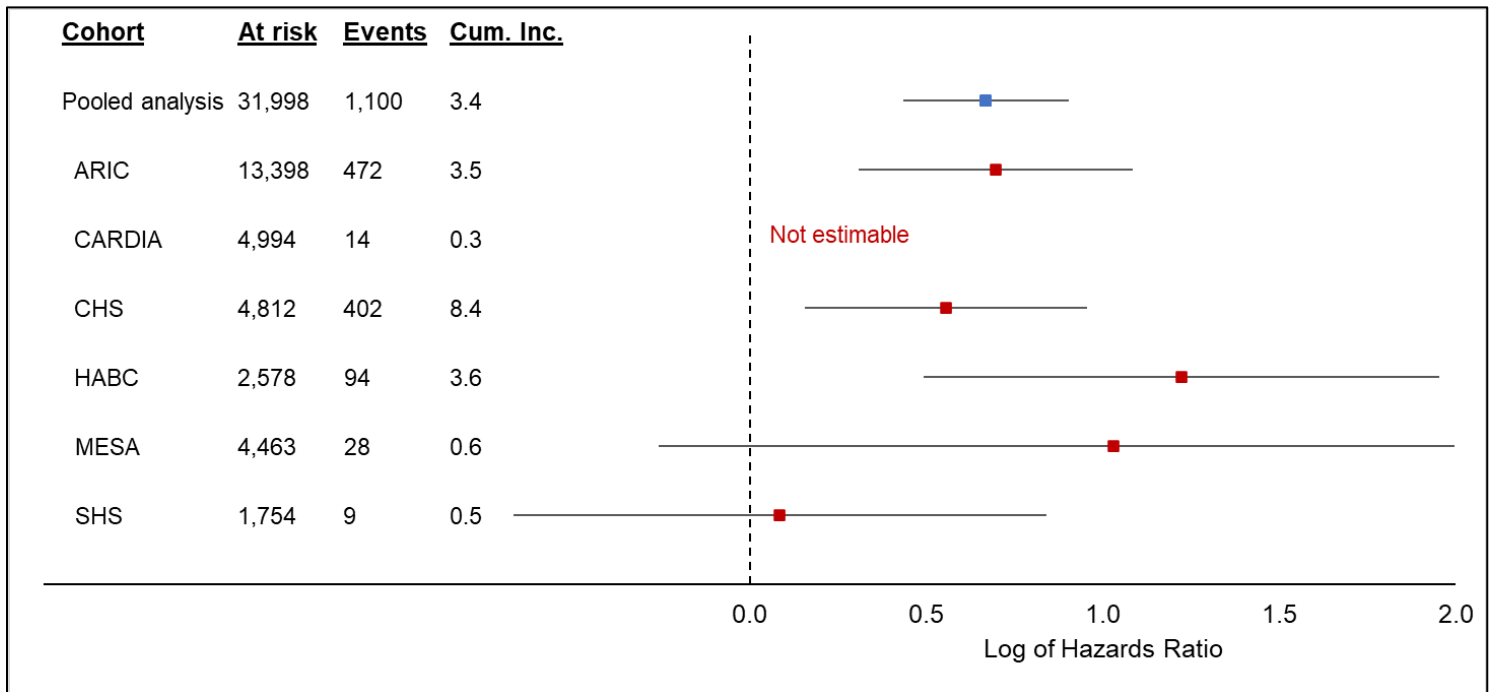

Lung function categories were defined as: PRISm =  $FEV_1/FVC \geq 0.7$ ,  $FEV_1 < 80\%$ ; Obstructive spirometry =  $FEV_1/FVC < 0.7$ ; Normal spirometry =  $FEV_1/FVC \geq 0.7$ ,  $FEV_1 \geq 80\%$ .

ARIC = Atherosclerosis Risk in Communities study; CARDIA = Coronary Artery Risk Development in Young Adults study; CHS = Cardiovascular Health Study; HABC = Health ABC study; JHS = Jackson Heart Study; MESA = Multi-Ethnic Study of Atherosclerosis; SHS = Strong Heart Study

Cox proportional hazards models were adjusted for age, gender, race/ethnicity, education, body mass index, smoking status, medical comorbidities such as, hypertension, diabetes, coronary heart disease, congestive heart failure, stroke, and estimated glomerular filtration rate

**eFigure 13.** Forest Plot of Cohort-Stratified Analyses (PRISm vs Normal Spirometry) for CHD Mortality

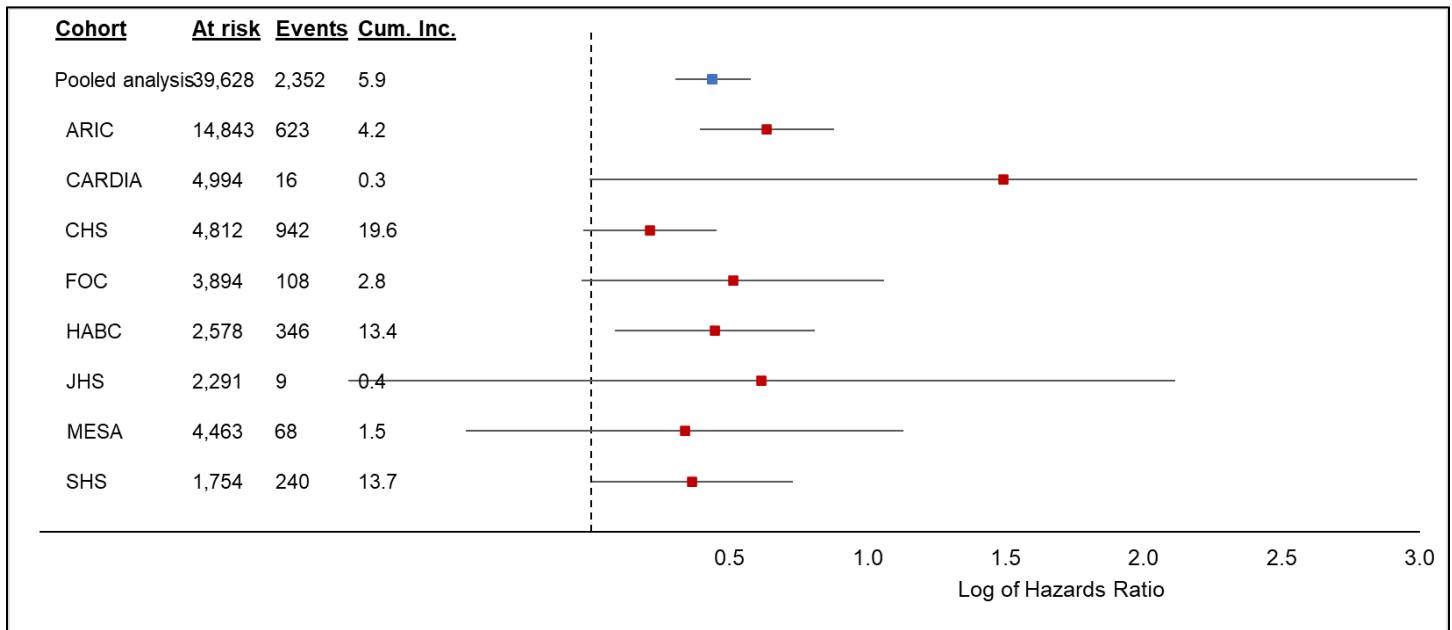

Lung function categories were defined as: PRISm =  $FEV_1/FVC \geq 0.7$ ,  $FEV_1 < 80\%$ ; Obstructive spirometry =  $FEV_1/FVC < 0.7$ ; Normal spirometry =  $FEV_1/FVC \geq 0.7$ ,  $FEV_1 \geq 80\%$ .

ARIC = Atherosclerosis Risk in Communities study; CARDIA = Coronary Artery Risk Development in Young Adults study; CHS = Cardiovascular Health Study; FOC = Framingham Offspring Cohort; HABC = Health ABC study; JHS = Jackson Heart Study; MESA = Multi-Ethnic Study of Atherosclerosis; SHS = Strong Heart Study

Cox proportional hazards models were adjusted for age, gender, race/ethnicity, education, body mass index, smoking status, medical comorbidities such as, hypertension, diabetes, coronary heart disease, congestive heart failure, stroke, and estimated glomerular filtration rate.

**eFigure 14.** Forest Plot of Cohort-Stratified Analyses (PRISm vs Normal Spirometry) for Respiratory-Related Events

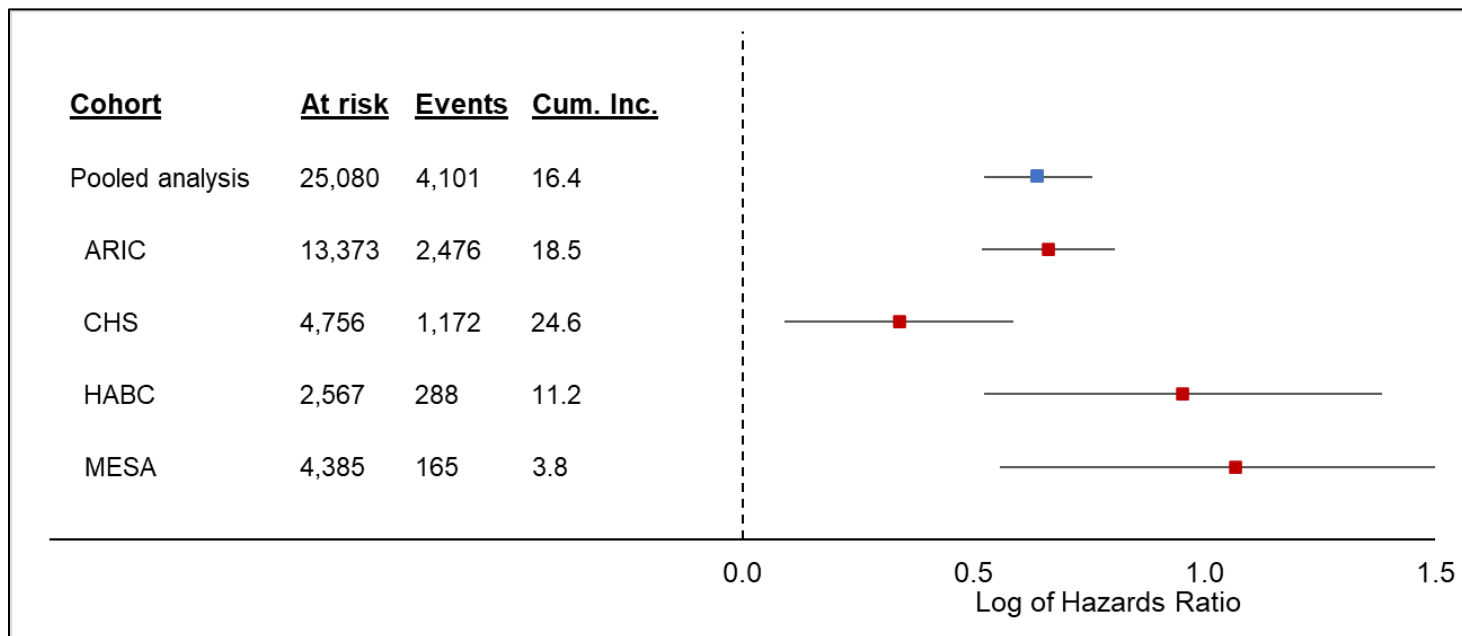

Lung function categories were defined as: PRISm =  $FEV_1/FVC \geq 0.7$ ,  $FEV_1 < 80\%$ ; Obstructive spirometry =  $FEV_1/FVC < 0.7$ ; Normal spirometry =  $FEV_1/FVC \geq 0.7$ ,  $FEV_1 \geq 80\%$ .

ARIC = Atherosclerosis Risk in Communities study; CHS = Cardiovascular Health Study; HABC = Health ABC study; MESA = Multi-Ethnic Study of Atherosclerosis

Cox proportional hazards models were adjusted for age, gender, race/ethnicity, education, body mass index, smoking status, medical comorbidities such as, hypertension, diabetes, coronary heart disease, congestive heart failure, stroke, and estimated glomerular filtration rate.



**eFigure 15.** Forest Plot of Cohort-Stratified Analyses (PRISm vs Normal Spirometry) for CHD-Related Events

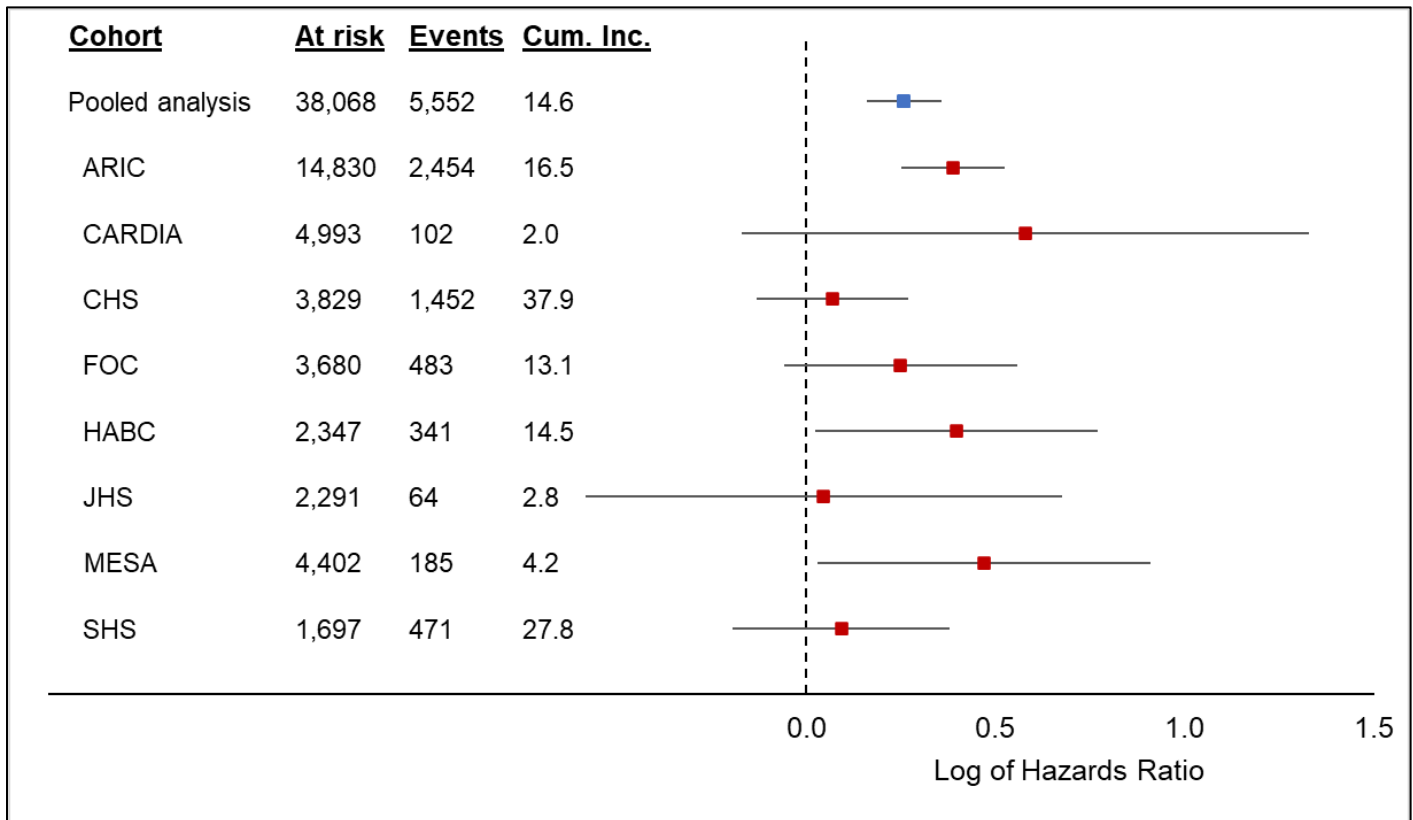

Lung function categories were defined as: PRISm =  $FEV_1/FVC \geq 0.7$ ,  $FEV_1 < 80\%$ ; Obstructive spirometry =  $FEV_1/FVC < 0.7$ ; Normal spirometry =  $FEV_1/FVC \geq 0.7$ ,  $FEV_1 \geq 80\%$ .

ARIC = Atherosclerosis Risk in Communities study; CARDIA = Coronary Artery Risk Development in Young Adults study; CHS = Cardiovascular Health Study; FOC = Framingham Offspring Cohort; HABC = Health ABC study; JHS = Jackson Heart Study; MESA = Multi-Ethnic Study of Atherosclerosis; SHS = Strong Heart Study

Cox proportional hazards models were adjusted for age, gender, race/ethnicity, education, body mass index, smoking status, medical comorbidities such as, hypertension, diabetes, coronary heart disease, congestive heart failure, stroke, and estimated
